# Supplementary material for: Benchmarking soil multifunctionality
Source: Copernicus journal article supplement (doi:10.5194/egusphere-2024-2851), 2024-09-26
Supplement: Supplementary file 1 [file egusphere-2024-2851-supplement.zip]

## Sheet: Metadata
Metadata
Soil	Type of soil. Soil 0/ potting soil contained potting soil serving as internal standard
Pot	Pot ID
Species	Seeded plant species
Individu	De ID van de plant per pot.
Mass_in_g	Shoot dry mass in g
length_in_cm	Shoot length at harvest, in centimeter.
Age_day	Days after sowing
Fertilized	Ttype of Hoagland fertilization: Control (20 ml water), Low (3 ml Hoagl. + 17 ml water) or High (6 ml Hoagl. + 14 ml water).
Pot layout upon randomization in the greenhouse for experiement 1
Pot layout upon randomization in the greenhouse for experiement 2

## Sheet: Soils
Soil no.	Sample ID	Province NL	Location name	Type of grassland	Soil type_main group Dutch system*	Soil_type translated	Soil type_detailed	Sampling date	Air temperature (°C)	Slope (degrees)	Slope	Soil temperature reading 1 (°C)	Soil temperature reading 2 (°C)	Soil temperature reading 3 (°C)	Soil temperature_average 1 (°C)	Vegetation height max (cm)	Vegetation height min (cm)	Plant cover (%)	Soil profile notes	Latitude (decimal degrees)	Longitude (decimal degrees)
1	OHMAA004	Gelderland	Gentse Waard	(semi) Natural	Rivierkleigronden	Riverine clay soil	Kalkhoudende poldervaaggronden; zavel, profielverloop 02	2021-08-06	20.8	0	/	19	20	20	19.67	84	17	99		51.8723	5.98221
1	OHMAA005	Gelderland	Gentse Waard	(semi) Natural	Rivierkleigronden	Riverine clay soil	Kalkhoudende poldervaaggronden; zavel, profielverloop 2	2021-08-06	24.3	0	/	25	24	24	24.33	56	14	100		51.8719	5.97886
1	OHMAA006	Gelderland	Gentse Waard	(semi) Natural	Rivierkleigronden	Riverine clay soil	Kalkhoudende poldervaaggronden; zavel, profielverloop 2	2021-08-06	27.6	0	/	26	27	26	26.33	60	13	100		51.8729	5.97905
2	OHMAA007	Gelderland	Klompensewaard	(semi) Natural	Rivierkleigronden	Riverine clay soil	Kalkhoudende poldervaaggronden; zware zavel en lichte klei, profielverloop 5	2021-08-06	28.4	0	/	22	20	20	20.67	100	54	100	Dry, compact, clay	51.888	6.02248
2	OHMAA008	Gelderland	Klompensewaard	(semi) Natural	Rivierkleigronden	Riverine clay soil	Kalkhoudende poldervaaggronden; zware zavel en lichte klei, profielverloop 5	2021-08-06	28.4	0	/	30	24	25	26.33	61	19	100		51.8876	6.01924
2	OHMAA009	Gelderland	Klompensewaard	(semi) Natural	Rivierkleigronden	Riverine clay soil	Kalkhoudende poldervaaggronden; zware zavel en lichte klei, profielverloop 5	2021-08-06	28.4	3.2	East-West (270-90)	29	26	27	27.33	54	19	100		51.8865	6.02373
3	OHMAA022	Gelderland	Meeuwenkampje, onder spoorlijn	(semi) Natural	Veengrond	Peat soil	Meerveengronden op zand zonder humuspodzol, beginnend ondieper dan 120 cm	2021-09-06	27	0	/	22	21	22	21.67	65	17	100		52.0491	5.54687
3	OHMAA023	Gelderland	Meeuwenkampje, onder spoorlijn	(semi) Natural	Veengrond	Peat soil	Meerveengronden op zand zonder humuspodzol, beginnend ondieper dan 120 cm	2021-09-06	26.8	0	/	22	26	25	24.33	65	10	100		52.0485	5.54554
3	OHMAA024	Gelderland	Meeuwenkampje, onder spoorlijn	(semi) Natural	Veengrond	Peat soil	Meerveengronden op zand zonder humuspodzol, beginnend ondieper dan 120 cm	2021-09-06	23.3	0	/	20	19	18	19	75	30	100		52.049	5.54432
4	OHMAA025	Gelderland	Boederij Melktap de Groene grens	(semi) Natural	Kalkloze zandgronden	Chalk poor sandy soil	Beekeerdgronden; lemig fijn zand	2021-11-06	26.7	0	/	24	22	22	22.67	50	26	100		52.0219	5.58901
4	OHMAA026	Gelderland	Boederij Melktap de Groene grens	(semi) Natural	Kalkloze zandgronden	Chalk poor sandy soil	Beekeerdgronden; lemig fijn zand	2021-11-06	26.7	0	/	31	30	28	29.67	56	40	95		52.022	5.58801
5	OHMAA027	Gelderland	VleesBoederij Binnenveld	Production farm	Enkeerdgrond		Hoge zwarte enkeerdgronden; leemarm en zwak lemig fijn zand	2021-10-06	24.6	0	/	28	27	27	27.33	19	5	98	Lots of Ants, black sand	51.9866	5.57359
5	OHMAA028	Gelderland	VleesBoederij Binnenveld	Production farm	Enkeerdgrond		Hoge zwarte enkeerdgronden; leemarm en zwak lemig fijn zand	2021-10-06	24.6	0	/	28	27	27	27.33	18	4	100		51.9863	5.57333
5	OHMAA029	Gelderland	VleesBoederij Binnenveld	Production farm	Enkeerdgrond		Hoge zwarte enkeerdgronden; leemarm en zwak lemig fijn zand	2021-10-06	24.6	0	/	27	26	24	25.67	24	10	93		51.9873	5.57314
6	OHMAA030	Gelderland	Kippenboederij Steenbergen	Nature-inclusive farm	Humuspodzolgronden		Laarpodzolgronden; leemarm en zwak lemig fijn zand	2021-10-06	28.2	0	/	33	37	37	35.67	11	6	90		52.0129	5.63744
6	OHMAA031	Gelderland	Kippenboederij Steenbergen	Nature-inclusive farm	Humuspodzolgronden		Laarpodzolgronden; leemarm en zwak lemig fijn zand	2021-10-06	28.2	0	/	33	34	35	34	12	6	100		52.0131	5.63794
6	OHMAA032	Gelderland	Kippenboederij Steenbergen	Nature-inclusive farm	Humuspodzolgronden		Laarpodzolgronden; leemarm en zwak lemig fijn zand	2021-10-06	28.3	0	/	34	25	32	30.33	19	9	100		52.0131	5.6374
7	OHMAA061	Utrecht	Boer Cock - Referentie	(semi) Natural	Zeekleigrond	Marine clay	Kalkarme leek-/woudeerdgronden; klei, profielverloop 3, of 3 en 4 of 4	6/16/2021	28.2	0	/	31	30	32	31	20	5	90		52.2794	5.02644
7	OHMAA062	Utrecht	Boer Cock - Referentie	(semi) Natural	Zeekleigrond	Marine clay	Kalkarme leek-/woudeerdgronden; klei, profielverloop 3, of 3 en 4 of 4	6/16/2021	28.2	0	/	32	30	28	30	8	4	95		52.2788	5.02644
7	OHMAA063	Utrecht	Boer Cock - Referentie	(semi) Natural	Zeekleigrond	Marine clay	Kalkarme leek-/woudeerdgronden; klei, profielverloop 3, of 3 en 4 of 5	6/16/2021	28.2	0	/	28	29		28.5	14	5	100		52.2783	5.02719
8	OHMAA064	Noord-holland	Vuntus	(semi) Natural	Humuspodzolgronden	Marine clay	Laarpodzolgronden; leemarm en zwak lemig fijn zand	6/17/2021	26.3	0	/	24	25	24	24.33	14	8	98		52.2152	5.11645
8	OHMAA065	Noord-holland	Vuntus	(semi) Natural	Humuspodzolgronden	Marine clay	Laarpodzolgronden; leemarm en zwak lemig fijn zand	6/17/2021	26.3	0	/	28	26	28	27.33	12	4	98		52.2146	5.11607
8	OHMAA066	Noord-holland	Vuntus	(semi) Natural	Humuspodzolgronden	Marine clay	Laarpodzolgronden; leemarm en zwak lemig fijn zand	6/17/2021	26.3	0	/	30	27	30	29	14	8	85		52.2141	5.11559
9	OHMAA067	Noord-holland	Vuntus Blanco	(semi) Natural	Humuspodzolgronden	Marine clay	Laarpodzolgronden; leemarm en zwak lemig fijn zand	6/18/2021	22.7	0	/	20	23	23	22	20	65	90	top 5cm wet, undernead everything dry	52.2136	5.11573
9	OHMAA068	Noord-holland	Vuntus Blanco	(semi) Natural	Humuspodzolgronden	Marine clay	Laarpodzolgronden; leemarm en zwak lemig fijn zand	6/18/2021	29.4	0	/	24	23	23	23.33	18	9	85	top layer slightly wet, not as 67. remainder dry	52.2143	5.11639
9	OHMAA069	Noord-holland	Vuntus Blanco	(semi) Natural	Humuspodzolgronden	Marine clay	Laarpodzolgronden; leemarm en zwak lemig fijn zand	6/18/2021	27.1	0	/	25	24	26	25	23.5	8	95	top layer slightly wet, remainder dry	52.2151	5.11718
10	OHMAA070	Noord-Holland	Bussum	(semi) Natural	Associaties	Associations	Petgaten	6/17/2021	28.3	3.6	231	20	19	19	19.33	10	8	95	moist -> drainage?	52.2624	5.10499
10	OHMAA071	Noord-Holland	Bussum	(semi) Natural	Associaties	Associations	Petgaten	6/17/2021	32.8	±0	/	26	23	28	25.67	10	6	98	moist	52.2626	5.10487
10	OHMAA072	Noord-Holland	Bussum	(semi) Natural	Associaties	Associations	Petgaten	6/17/2021	31.1	0	/	26	25	34	28.33	18	8	80	moist, yellow sand at 35cm. More roots in comparison to other two plots	52.2627	5.10487
11	OHMAA073	Noord-Holland	Bussum	(semi) Natural	Associaties	Associations	Petgaten	6/17/2021	35.3	0	/	24	26	24	24.67	18	16	80		52.2632	5.10326
11	OHMAA074	Noord-Holland	Bussum	(semi) Natural	Associaties	Associations	Petgaten	6/17/2021	37.3	0	/	24	22	26	24	15	7	80	37,3 air temp	52.2632	5.1033
11	OHMAA075	Noord-Holland	Bussum	(semi) Natural	Associaties	Associations	Petgaten	6/17/2021	34.2	0	/	27	30	30	29	20	7	90	34,2 air temp	52.2631	5.10336
12	OHMAA076	Utrecht	Weerslot 1 Blanco	(semi) Natural	Veengrond	Peat soil	Koopveengronden op zand, beginnend ondieper dan 120 cm (076 = moerige grond)	6/18/2021	22.4	0	/	22	22	27	23.67	54	10	100	Humus containing layer ±5cm	52.1769	5.11293
12	OHMAA077	Utrecht	Weerslot 1 Blanco	(semi) Natural	Veengrond	Peat soil	Koopveengronden op zand, beginnend ondieper dan 120 cm (076 = moerige grond)	6/18/2021	22.4	0	/	22	21	22	21.67	45	6	93	Humus = 5cm	52.1771	5.11405
12	OHMAA078	Utrecht	Weerslot 1 Blanco	(semi) Natural	Veengrond	Peat soil	Koopveengronden op zand, beginnend ondieper dan 120 cm (076 = moerige grond)	6/18/2021	22.4	0	/	25	26	23	24.67	60	9	99	Humus = 3cm	52.1773	5.11534
13	OHMAA088	Noord-Holland	Wilco Kemps, Referentie	(semi) Natural	Moerige grond		Moerige podzolgronden met een humushoudend zanddek en een moerige tussenlaag	6/21/2021	14.5	0	/	18	17	17	17.33	18	8	98		52.2453	5.11808
13	OHMAA089	Noord-Holland	Wilco Kemps, Referentie	(semi) Natural	Moerige grond		Moerige podzolgronden met een humushoudend zanddek en een moerige tussenlaag	6/21/2021	14.5	0	/	17	16	17	16.67	16	4	100		52.2455	5.11645
13	OHMAA090	Noord-Holland	Wilco Kemps, Referentie	(semi) Natural	Moerige grond		Moerige podzolgronden met een humushoudend zanddek en een moerige tussenlaag	6/21/2021	14.5	0	/	17	17	17	17	17	7	100		52.2466	5.1139
14	OHMAA103	Utrecht	Leusden Bio Boer	Nature-inclusive farm	Enkeerdgrond		Hoge bruine enkeerdgronden; lemig fijn zand	6/23/2021	21.5	0	/	19	19	19	19	61	11	100		52.1322	5.47776
14	OHMAA104	Utrecht	Leusden Bio Boer	Nature-inclusive farm	Enkeerdgrond		Hoge bruine enkeerdgronden; lemig fijn zand	6/23/2021	23.9	0	/	19	18	19	18.67	46	11	98		52.1316	5.47838
14	OHMAA105	Utrecht	Leusden Bio Boer	Nature-inclusive farm	Enkeerdgrond		Hoge bruine enkeerdgronden; lemig fijn zand	6/23/2021	34.6	0	/	19	19	19	19	39	11	99		52.1314	5.4796
15	OHMAA106	Utrecht	Leusden gangbare boer	Production farm	Kalkloze zandgronden		Beekeerdgronden; lemig fijn zand	6/23/2021	26.7	0	/	25	25	23	24.33	21	7	77		52.1288	5.46362
15	OHMAA107	Utrecht	Leusden gangbare boer	Production farm	Kalkloze zandgronden		Beekeerdgronden; lemig fijn zand	6/23/2021	26.2	0	/	23	24	25	24	21	13	90		52.1284	5.46372
15	OHMAA108	Utrecht	Leusden gangbare boer	Production farm	Kalkloze zandgronden		Beekeerdgronden; lemig fijn zand	6/23/2021		0	/	24	24	23	23.67	22	8	95		52.1283	5.46439
16	OHMAA109	Utrecht	Boer van Leeuwen, Veenendaal - Gangbaar	Production farm	Veengrond	Peat soil	Meerveengronden op zand zonder humuspodzol, beginnend ondieper dan 120 cm	6/30/2021	16.7	0	/	18	17	18	17.67	8	4	100		52.0461	5.54896
16	OHMAA110	Utrecht	Boer van Leeuwen, Veenendaal - Gangbaar	Production farm	Veengrond	Peat soil	Meerveengronden op zand zonder humuspodzol, beginnend ondieper dan 120 cm	6/30/2021	15.1	3.04	240	15	18	18	17	19	5	100		52.0464	5.55053
16	OHMAA111	Utrecht	Boer van Leeuwen, Veenendaal - Gangbaar	Production farm	Veengrond	Peat soil	Meerveengronden op zand zonder humuspodzol, beginnend ondieper dan 120 cm	6/30/2021	15.3	0	/	18	18	18	18	9	4	96		52.0459	5.55198
17	OHMAA112		Clevelt productie	Production farm	Rivierkleigronden	Riverine clay soil	Kalkhoudende ooivaaggronden; zware zavel en lichte klei	2021-01-07	14.6	0	/	17	17	17	17	27	7	70		51.8874	6.07401
17	OHMAA113		Clevelt productie	Production farm	Rivierkleigronden	Riverine clay soil	Kalkhoudende ooivaaggronden; zware zavel en lichte klei	2021-01-07	18.7	0	/	18	17	18	17.67	22	9	80		51.887	6.07505
17	OHMAA114		Clevelt productie	Production farm	Rivierkleigronden	Riverine clay soil	Kalkhoudende ooivaaggronden; zware zavel en lichte klei	2021-01-07	18.1	0	/	17	18	18	17.67	21	9	85		51.8862	6.07512
18	OHMAA115	Gelderland	Gendtsewaard - Gangbaar (boerderijwinkel)	Production farm	Rivierkleigronden	Riverine clay soil	Kalkhoudende poldervaaggronden; zware zavel en lichte klei, profielverloop 5	6/28/2021	24.5	0	/	19	19	19	19	53	14	100	light clay, high sandpercentage	51.8922	5.95983
18	OHMAA116	Gelderland	Gendtsewaard - Gangbaar (boerderijwinkel)	Production farm	Rivierkleigronden	Riverine clay soil	Kalkhoudende poldervaaggronden; zware zavel en lichte klei, profielverloop 5	6/28/2021	25.5	0	/	20	19	19	19.33	38	20	100	Hard	51.8923	5.9595
18	OHMAA117	Gelderland	Gendtsewaard - Gangbaar (boerderijwinkel)	Production farm	Rivierkleigronden	Riverine clay soil	Kalkhoudende poldervaaggronden; zware zavel en lichte klei, profielverloop 5	6/28/2021	27.5	0	/	19	20	20	19.67	70	18	100		51.893	5.95976
19	OHMAA118	Gelderland	Bemmelse Waard - kruidenrijk grasland	Production farm	Rivierkleigronden	Riverine clay soil	Kalkhoudende poldervaaggronden; zavel, profielverloop 2	6/28/2021	25.1	0	/	25	24	24	24.33	18	9	75	Hard, Heavy clay	51.8793	5.89796
19	OHMAA119	Gelderland	Bemmelse Waard - kruidenrijk grasland	Production farm	Rivierkleigronden	Riverine clay soil	Kalkhoudende poldervaaggronden; zavel, profielverloop 2	6/28/2021	26.9	0	/	25	24	24	24.33	15	9	80		51.8796	5.89801
19	OHMAA120	Gelderland	Bemmelse Waard - kruidenrijk grasland	Production farm	Rivierkleigronden	Riverine clay soil	Kalkhoudende poldervaaggronden; zavel, profielverloop 2	6/28/2021	25.4	0	/	24	24	24	24	10	7	90		51.88	5.89861
20	OHMAA121	Utrecht	HC Renswoude (meeuwenkampje boven gangbaar)	Production farm	Kalkloze zandgronden	Chalk poor sandy soil	Beekeerdgronden; lemig fijn zand	6/29/2021	21	0	/	20	20	20	20	43	18	98	sand with organic material	52.0516	5.55065
20	OHMAA122	Utrecht	HC Renswoude (meeuwenkampje boven gangbaar)	Production farm	Kalkloze zandgronden	Chalk poor sandy soil	Beekeerdgronden; lemig fijn zand	6/29/2021	21	0	/	21	21	21	21	33	10	98	horse manure	52.0517	5.55024
20	OHMAA123	Utrecht	HC Renswoude (meeuwenkampje boven gangbaar)	Production farm	Kalkloze zandgronden	Chalk poor sandy soil	Beekeerdgronden; lemig fijn zand	6/29/2021	21.1	0	/	21	21	21	21	25	5	95		52.0518	5.55031
21	OHMAA124	Utrecht	Fam. Van Ginkel Renswoude - bioboer (meeuwenkampje boven)	Nature-inclusive farm	Kalkloze zandgronden	Chalk poor sandy soil	Beekeerdgronden; lemig fijn zand	6/29/2021	24.8	0	/	21	231	22	91.33	31	9	100	rust/iron deposits at the bottom	52.088	5.55123
21	OHMAA125	Utrecht	Fam. Van Ginkel Renswoude - bioboer (meeuwenkampje boven)	Nature-inclusive farm	Kalkloze zandgronden	Chalk poor sandy soil	Beekeerdgronden; lemig fijn zand	6/29/2021	24.8	0	/	23	23	23	23	17	7	99		52.0885	5.55153
21	OHMAA126	Utrecht	Fam. Van Ginkel Renswoude - bioboer (meeuwenkampje boven)	Nature-inclusive farm	Kalkloze zandgronden	Chalk poor sandy soil	Beekeerdgronden; lemig fijn zand	6/29/2021	24.8	0	/	22	21	21	21.33	36	9	100		52.0888	5.55179
22	OHMAA127		Gerdt, natuur inclusief boer	Nature-inclusive farm	Rivierkleigronden	Riverine clay soil	Kalkhoudende poldervaaggronden; zware zavel en lichte klei, profielverloop 5	2021-01-07	15.1	0	/	17	17	17	17	71	21	100		51.8826	6.07148
22	OHMAA128		Gerdt, natuur inclusief boer	Nature-inclusive farm	Rivierkleigronden	Riverine clay soil	Kalkhoudende poldervaaggronden; zware zavel en lichte klei, profielverloop 5	2021-01-07	14.6	0	/	17	17	17	17	45	16	100		51.8822	6.06855
22	OHMAA129		Gerdt, natuur inclusief boer	Nature-inclusive farm	Rivierkleigronden	Riverine clay soil	Kalkhoudende poldervaaggronden; zware zavel en lichte klei, profielverloop 5	2021-01-07	14.1	0	/	16	16	17	16.33	31	11	100		51.8814	6.0664
23	OHMAA133		locatie onbekend		Moderpodzolgronden		Loopodzolgronden; lemig fijn zand	2021-07-07	26	0	/	24	23	24	23.67	16	8	98		53.0067	6.68176
23	OHMAA134		locatie onbekend		Moderpodzolgronden		Loopodzolgronden; lemig fijn zand	2021-07-07	28.7	0	/	24	24	24	24	18	8	98		53.0061	6.68216
23	OHMAA135		locatie onbekend		Moderpodzolgronden		Loopodzolgronden; lemig fijn zand	2021-07-07	26.2	0	/	24	23	24	23.67	18	7	97		53.0057	6.68189
24	OHMAA136	Drenthe	Eeksweg, Anderen		Humuspodzolgronden		Veldpodzolgronden; leemarm en zwak lemig fijn zand	2021-09-07	20.8	0	/	20	19	20	19.67	79	18	100	Clay all the way down	53.0023	6.70283
24	OHMAA137	Drenthe	Eeksweg, Anderen		Humuspodzolgronden		Veldpodzolgronden; leemarm en zwak lemig fijn zand	2021-09-07	21.7	0	/	20	19	19	19.33	22	18	100		53.0021	6.70247
24	OHMAA138	Drenthe	Eeksweg, Anderen		Humuspodzolgronden		Veldpodzolgronden; leemarm en zwak lemig fijn zand	2021-09-07	21	0	/	19	19	19	19	54	18	100		53.0026	6.70238
25	OHMAA139	Drenthe	Koelanden, Anderen	Production farm	Humuspodzolgronden		Veldpodzolgronden; leemarm en zwak lemig fijn zand	2021-09-07	24.8	0	/	22	22	26	23.33	40	16	100		53.0038	6.67393
25	OHMAA140	Drenthe	Koelanden, Anderen	Production farm	Humuspodzolgronden		Veldpodzolgronden; leemarm en zwak lemig fijn zand	2021-09-07	25.4	0	/	21	21	21	21	46	10	100		53.0036	6.67558
25	OHMAA141	Drenthe	Koelanden, Anderen	Production farm	Humuspodzolgronden		Veldpodzolgronden; leemarm en zwak lemig fijn zand	2021-09-07	23.6	0	/	21	21	22	21.33	45	15	100	a lot of grubs (engerlingen??)	53.0036	6.67693
26	OHMAA160		Ravensbosch - Geitenboerderij tussenvorm	Nature-inclusive farm	Leembrikgronden		Radebrikgronden; siltige leem	2021-12-07	31.5	0	/	26	26	26	26	16	7	80		50.8858	5.83622
26	OHMAA161		Ravensbosch - Geitenboerderij tussenvorm	Nature-inclusive farm	Leembrikgronden		Radebrikgronden; siltige leem	2021-12-07	27.6	0	/	26	25	24	25	15	7	80		50.8861	5.83603
26	OHMAA162		Ravensbosch - Geitenboerderij tussenvorm	Nature-inclusive farm	Leembrikgronden		Radebrikgronden; siltige leem	2021-12-07	26.7	0	/	24	23	23	23.33	20	7	80		50.8858	5.83528
27	OHMAA163	Limburg	Hooiboer - Maastricht - Gangbaar	Production farm	Leembrikgronden		Radebrikgronden; siltige leem	7/14/2021	17.6	0	/	18	18	18	18	65	24	100		50.8567	5.75132
27	OHMAA164	Limburg	Hooiboer - Maastricht - Gangbaar	Production farm	Leembrikgronden		Radebrikgronden; siltige leem	7/14/2021	17.8	0	/	18	18	18	18	65	30	100		50.8569	5.7514
27	OHMAA165	Limburg	Hooiboer - Maastricht - Gangbaar	Production farm	Leembrikgronden		Radebrikgronden; siltige leem	7/14/2021	17.8	0	/	18	18	18	18	50	24	100		50.8566	5.75175
28	OHMAA166	Limburg	Natuur Mechelen	(semi) Natural	Rivierkleigronden	Riverine clay soil	Kalkloze poldervaaggronden; lichte zavel, profielverloop 5	7/13/2021	18.3	0	/	20	20	20	20	20	5	99		50.7892	5.91921
28	OHMAA167	Limburg	Natuur Mechelen	(semi) Natural	Rivierkleigronden	Riverine clay soil	Kalkloze poldervaaggronden; lichte zavel, profielverloop 6	7/13/2021	18.5	0	/	19	19	19	19	19	5	99		50.7894	5.91963
28	OHMAA168	Limburg	Natuur Mechelen	(semi) Natural	Rivierkleigronden	Riverine clay soil	Kalkloze poldervaaggronden; lichte zavel, profielverloop 7	7/13/2021	18.2	0	/	20	20	20	20	35	9	100		50.7898	5.92028
29	OHMAA169	Limburg	Paardenstal - Bio - Klimmen	Nature-inclusive farm	Leembrikgronden	Riverine clay soil	Radebrikgronden; siltige leem	7/13/2021	18.2	0	/	20	20	20	20	0.5	0.5	55		50.8819	5.87103
29	OHMAA170	Limburg	Paardenstal - Bio - Klimmen	Nature-inclusive farm	Leembrikgronden	Riverine clay soil	Radebrikgronden; siltige leem	7/13/2021	18.6	0	/	20	19	19	19.33	0.5	0.5	60		50.8819	5.8708
29	OHMAA171	Limburg	Paardenstal - Bio - Klimmen	Nature-inclusive farm	Leembrikgronden	Riverine clay soil	Radebrikgronden; siltige leem	7/13/2021	18.4	0	/	20	20	20	20	0.5	0.5	65		50.8821	5.87096
30	OHMAA172	Limburg	Maasduinen - Natuurlijk	(semi) Natural	Oude rivierkleigronden	Old riverine clay soil	Poldervaaggronden; zware zavel	7/21/2021	22.3	0	/	21	21	21	21	17	7	100		51.4576	6.18124
30	OHMAA173	Limburg	Maasduinen - Natuurlijk	(semi) Natural	Oude rivierkleigronden	Old riverine clay soil	Poldervaaggronden; zware zavel	7/21/2021	24.3	0	/	17	18	17	17.33	120	44	100		51.4577	6.18036
30	OHMAA174	Limburg	Maasduinen - Natuurlijk	(semi) Natural	Oude rivierkleigronden	Old riverine clay soil	Poldervaaggronden; zware zavel	7/21/2021	22.1	0	/	22	23	22	22.33	30	10	95		51.458	6.17885
Z	Z	Zanderij Maarn	Utrecht	(semi) Natural	Moderpodzolgronden
M	M	Millingerwaard	Gelderland	(semi) Natural	Rivierkleigronden	Riverine clay soil
* Inferred from the Dutch soil map: https://www.wur.nl/nl/show/bodemkaart-van-nederland.htm

## Sheet: Data experiment 1
Soil	Rep	Pot	Species	Individu	Mass_in_g	length_in_cm	Age_day
0	A	120	Arabidopsis	120A_d1A	0.174	-	33
0	A	120	Arabidopsis	120A_d1B	0.101	-	33
0	A	120	Arabidopsis	120A_d2A	0.197	30.6	44
0	A	120	Arabidopsis	120A_d2B	0.024	8.7	44
0	B	240	Arabidopsis	240A_d1A	0.035	-	33
0	B	240	Arabidopsis	240A_d1B	0.174	-	33
0	B	240	Arabidopsis	240A_d2A	0.446	36.7	44
0	B	240	Arabidopsis	240A_d2B	0.203	-	44
0	A	163	Festuca	163F_d1A	0.085	20.7	47
0	A	163	Festuca	163F_d1B	-	-	47
0	A	163	Festuca	163F_d2A	0.053	16.9	63
0	A	163	Festuca	163F_d2B	0.068	24.1	63
0	B	178	Festuca	178F_d1A	0.263	34.5	47
0	B	178	Festuca	178F_d1B	0.051	19.1	47
0	B	178	Festuca	178F_d2A	0.282	23	63
0	B	178	Festuca	178F_d2B	0.16	26	63
0	A	80	Trifolium	80T_d1A	0.171	17	28
0	A	80	Trifolium	80T_d1B	0.097	15.2	28
0	A	80	Trifolium	80T_d2A	0.082	10.6	44
0	A	80	Trifolium	80T_d2B	0.424	19.8	44
0	B	95	Trifolium	95T_d1A	0.249	15.4	28
0	B	95	Trifolium	95T_d1B	0.163	13.8	28
0	B	95	Trifolium	95T_d2A	0.337	17.5	44
0	B	95	Trifolium	95T_d2B	0.112	11.6	44
0	A	1	Wheat	1W_d1A	0.046	19.6	20
0	A	1	Wheat	1W_d1B	0.158	32.7	20
0	A	1	Wheat	1W_d2A	0.213	28.4	34
0	A	1	Wheat	1W_d2B	0.746	35.8	34
0	B	62	Wheat	62W_d1A	0.031	17.9	20
0	B	62	Wheat	62W_d1B	0.06	22.9	20
0	B	62	Wheat	62W_d2A	0.863	41.3	34
0	B	62	Wheat	62W_d2B	0.458	35.7	34
1	A	81	Arabidopsis	81A_d1A	0.014	-	33
1	A	81	Arabidopsis	81A_d1B	0.018	-	33
1	A	81	Arabidopsis	81A_d2A	0.039	19.6	44
1	A	81	Arabidopsis	81A_d2B	0.011	4.5	44
1	B	238	Arabidopsis	238A_d1A	0.096	-	33
1	B	238	Arabidopsis	238A_d1B	0.002	-	33
1	B	238	Arabidopsis	238A_d2A	0.048	25.1	44
1	B	238	Arabidopsis	238A_d2B	0.104	4.9	44
1	A	99	Festuca	99F_d1A	0.143	30.1	47
1	A	99	Festuca	99F_d1B	0.143	3.8	47
1	A	99	Festuca	99F_d2A	0.079	17.3	63
1	A	99	Festuca	99F_d2B	0.044	12.3	63
1	B	206	Festuca	206F_d1A	0.048	19.7	47
1	B	206	Festuca	206F_d1B	0.12	28.8	47
1	B	206	Festuca	206F_d2A	0.063	20.1	63
1	B	206	Festuca	206F_d2B	0.08	19.7	63
1	A	200	Trifolium	200T_d1A	0.053	9.2	28
1	A	200	Trifolium	200T_d1B	0.031	9.7	28
1	A	200	Trifolium	200T_d2A	0.089	13.1	44
1	A	200	Trifolium	200T_d2B	0.194	15.6	44
1	B	229	Trifolium	229T_d1A	0.006	1.7	28
1	B	229	Trifolium	229T_d1B	0.045	10.7	28
1	B	229	Trifolium	229T_d2A	0.066	9.1	44
1	B	229	Trifolium	229T_d2B	0.245	16.5	44
1	A	74	Wheat	74W_d1A	0.015	13	20
1	A	74	Wheat	74W_d1B	0.102	32	20
1	A	74	Wheat	74W_d2A	0.323	32.8	34
1	A	74	Wheat	74W_d2B	0.433	25.6	34
1	B	94	Wheat	94W_d1A	0.105	25.6	20
1	B	94	Wheat	94W_d1B	0.085	26	20
1	B	94	Wheat	94W_d2A	0.129	28.8	34
1	B	94	Wheat	94W_d2B	0.178	30.8	34
2	A	76	Arabidopsis	76A_d1A	0.022	-	33
2	A	76	Arabidopsis	76A_d1B	0.011	-	33
2	A	76	Arabidopsis	76A_d2A	0.062	21.2	44
2	A	76	Arabidopsis	76A_d2B	0.084	26.2	44
2	B	157	Arabidopsis	157A_d1A	0.044	-	33
2	B	157	Arabidopsis	157A_d1B	0.017	-	33
2	B	157	Arabidopsis	157A_d2A	0.055	15.1	44
2	B	157	Arabidopsis	157A_d2B	0.085	36.5	44
2	A	36	Festuca	36F_d1A	0.082	21.9	47
2	A	36	Festuca	36F_d1B	0.018	12.5	47
2	A	36	Festuca	36F_d2A	0.046	16.6	63
2	A	36	Festuca	36F_d2B	0.036	15.3	63
2	B	69	Festuca	69F_d1A	0.005	9.4	47
2	B	69	Festuca	69F_d1B	0.073	24.4	47
2	B	69	Festuca	69F_d2A	0.08	26.1	63
2	B	69	Festuca	69F_d2B	0.067	14.4	63
2	A	189	Trifolium	189T_d1A	0.04	10.7	28
2	A	189	Trifolium	189T_d1B	-	-	28
2	A	189	Trifolium	189T_d2A	0.193	19	44
2	A	189	Trifolium	189T_d2B	-	-	44
2	B	193	Trifolium	193T_d1A	0.018	8.3	28
2	B	193	Trifolium	193T_d1B	0.009	5.3	28
2	B	193	Trifolium	193T_d2A	0.159	15	44
2	B	193	Trifolium	193T_d2B	0.114	13.3	44
2	A	21	Wheat	21W_d1A	0.094	26.2	20
2	A	21	Wheat	21W_d1B	0.059	24.8	20
2	A	21	Wheat	21W_d2A	0.1	27.7	34
2	A	21	Wheat	21W_d2B	0.107	27.2	34
2	B	190	Wheat	190W_d1A	0.065	23.9	20
2	B	190	Wheat	190W_d1B	0.075	24.1	20
2	B	190	Wheat	190W_d2A	0.078	23.1	34
2	B	190	Wheat	190W_d2B	0.179	30.6	34
3	A	26	Arabidopsis	26A_d1A	0.0012	-	33
3	A	26	Arabidopsis	26A_d1B	0.0002	-	33
3	A	26	Arabidopsis	26A_d2A	0.0008	-	44
3	A	26	Arabidopsis	26A_d2B	0.002	-	44
3	B	32	Arabidopsis	32A_d1A	0.021	-	33
3	B	32	Arabidopsis	32A_d1B	0.064	-	33
3	B	32	Arabidopsis	32A_d2A	0.135	28.6	44
3	B	32	Arabidopsis	32A_d2B	0.007	1.9	44
3	A	49	Festuca	49F_d1A	0.006	8.5	47
3	A	49	Festuca	49F_d1B	0.014	13.6	47
3	A	49	Festuca	49F_d2A	0.016	11.5	63
3	A	49	Festuca	49F_d2B	0.001	5.8	63
3	B	111	Festuca	111F_d1A	0.153	17	47
3	B	111	Festuca	111F_d1B	0.141	37.4	47
3	B	111	Festuca	111F_d2A	0.222	32.6	63
3	B	111	Festuca	111F_d2B	0.088	24.9	63
3	A	118	Trifolium	118T_d1A	0.013	5.3	28
3	A	118	Trifolium	118T_d1B	0.012	3.6	28
3	A	118	Trifolium	118T_d2A	0.022	8.2	44
3	A	118	Trifolium	118T_d2B	0.01	4.3	44
3	B	179	Trifolium	179T_d1A	0.062	11.7	28
3	B	179	Trifolium	179T_d1B	0.02	7.3	28
3	B	179	Trifolium	179T_d2A	0.113	14.6	44
3	B	179	Trifolium	179T_d2B	0.164	15.6	44
3	A	132	Wheat	132W_d1A	0.104	32.3	20
3	A	132	Wheat	132W_d1B	0.052	27.8	20
3	A	132	Wheat	132W_d2A	0.056	25.7	34
3	A	132	Wheat	132W_d2B	0.183	35.5	34
3	B	221	Wheat	221W_d1A	0.071	23.1	20
3	B	221	Wheat	221W_d1B	0.038	21.5	20
3	B	221	Wheat	221W_d2A	0.078	27.2	34
3	B	221	Wheat	221W_d2B	0.068	21.8	34
4	A	40	Arabidopsis	40A_d1A	0.001	-	33
4	A	40	Arabidopsis	40A_d1B	0.012	-	33
4	A	40	Arabidopsis	40A_d2A	0.033	14.9	44
4	A	40	Arabidopsis	40A_d2B	0.034	19.6	44
4	B	242	Arabidopsis	242A_d1A	0.03	-	33
4	B	242	Arabidopsis	242A_d1B	0.074	-	33
4	B	242	Arabidopsis	242A_d2A	0.117	28	44
4	B	242	Arabidopsis	242A_d2B	0.086	34	44
4	A	84	Festuca	84F_d1A	0.044	16.9	47
4	A	84	Festuca	84F_d1B	0.008	7.6	47
4	A	84	Festuca	84F_d2A	0.042	18.8	63
4	A	84	Festuca	84F_d2B	0.026	15.6	63
4	B	143	Festuca	143F_d1A	0.01	12.8	47
4	B	143	Festuca	143F_d1B	0.0002	0.2	47
4	B	143	Festuca	143F_d2A	0.058	18.2	63
4	B	143	Festuca	143F_d2B	0.005	8.8	63
4	A	126	Trifolium	126T_d1A	0.089	11.5	28
4	A	126	Trifolium	126T_d1B	0.052	11.1	28
4	A	126	Trifolium	126T_d2A	0.09	10.1	44
4	A	126	Trifolium	126T_d2B	0.458	19.5	44
4	B	146	Trifolium	146T_d1A	0.02	8.3	28
4	B	146	Trifolium	146T_d1B	0.045	11.3	28
4	B	146	Trifolium	146T_d2A	0.301	16.2	44
4	B	146	Trifolium	146T_d2B	0.156	14.4	44
4	A	64	Wheat	64W_d1A	0.038	21.3	20
4	A	64	Wheat	64W_d1B	0.048	22.1	20
4	A	64	Wheat	64W_d2A	0.063	22.3	34
4	A	64	Wheat	64W_d2B	0.134	26.9	34
4	B	208	Wheat	208W_d1A	0.078	22.8	20
4	B	208	Wheat	208W_d1B	0.086	24.3	20
4	B	208	Wheat	208W_d2A	0.143	26.5	34
4	B	208	Wheat	208W_d2B	0.088	32.2	34
5	A	78	Arabidopsis	78A_d1A	0.0009	-	33
5	A	78	Arabidopsis	78A_d1B	0.0027	-	33
5	A	78	Arabidopsis	78A_d2A	0.004	6.8	44
5	A	78	Arabidopsis	78A_d2B	0.007	2.9	44
5	B	107	Arabidopsis	107A_d1A	0.0018	-	33
5	B	107	Arabidopsis	107A_d1B	0.0012	-	33
5	B	107	Arabidopsis	107A_d2A	0.035	14.5	44
5	B	107	Arabidopsis	107A_d2B	0.008	-	44
5	A	23	Festuca	23F_d1A	0.019	14.6	47
5	A	23	Festuca	23F_d1B	0.021	12.1	47
5	A	23	Festuca	23F_d2A	0.046	16.1	63
5	A	23	Festuca	23F_d2B	0.039	22.1	63
5	B	144	Festuca	144F_d1A	0.019	13.1	47
5	B	144	Festuca	144F_d1B	0.048	23.4	47
5	B	144	Festuca	144F_d2A	0.027	11.6	63
5	B	144	Festuca	144F_d2B	0.053	23	63
5	A	89	Trifolium	89T_d1A	0.031	9.5	28
5	A	89	Trifolium	89T_d1B	0.038	8.9	28
5	A	89	Trifolium	89T_d2A	0.289	16.5	44
5	A	89	Trifolium	89T_d2B	0.179	12.4	44
5	B	121	Trifolium	121T_d1A	0.041	11.4	28
5	B	121	Trifolium	121T_d1B	0.065	11.6	28
5	B	121	Trifolium	121T_d2A	0.103	15	44
5	B	121	Trifolium	121T_d2B	0.165	17.4	44
5	A	86	Wheat	86W_d1A	0.05	21.9	20
5	A	86	Wheat	86W_d1B	0.053	23.1	20
5	A	86	Wheat	86W_d2A	0.167	29.6	34
5	A	86	Wheat	86W_d2B	0.089	22.9	34
5	B	245	Wheat	245W_d1A	0.029	17.4	20
5	B	245	Wheat	245W_d1B	0.028	17.7	20
5	B	245	Wheat	245W_d2A	0.123	26.4	34
5	B	245	Wheat	245W_d2B	0.063	20.6	34
6	A	77	Arabidopsis	77A_d1A	0.0029	-	33
6	A	77	Arabidopsis	77A_d1B	0.012	-	33
6	A	77	Arabidopsis	77A_d2A	0.011	5.1	44
6	A	77	Arabidopsis	77A_d2B	0.019	10.2	44
6	B	119	Arabidopsis	119A_d1A	0.0013	-	33
6	B	119	Arabidopsis	119A_d1B	0.002	-	33
6	B	119	Arabidopsis	119A_d2A	0.014	10.2	44
6	B	119	Arabidopsis	119A_d2B	-	-	44
6	A	24	Festuca	24F_d1A	0.019	13.6	47
6	A	24	Festuca	24F_d1B	0.02	10.8	47
6	A	24	Festuca	24F_d2A	0.034	15.6	63
6	A	24	Festuca	24F_d2B	0.046	20.1	63
6	B	154	Festuca	154F_d1A	0.015	16.8	47
6	B	154	Festuca	154F_d1B	0.016	16	47
6	B	154	Festuca	154F_d2A	0.02	18.2	63
6	B	154	Festuca	154F_d2B	0.109	21.4	63
6	A	22	Trifolium	22F_d1A	0.025	8.3	28
6	A	22	Trifolium	22F_d1B	0.081	13.3	28
6	A	22	Trifolium	22F_d2A	0.204	13.1	44
6	A	22	Trifolium	22F_d2B	0.131	11.9	44
6	B	199	Trifolium	199T_d1A	0.027	9.5	28
6	B	199	Trifolium	199T_d1B	0.049	10.6	28
6	B	199	Trifolium	199T_d2A	0.272	16.4	44
6	B	199	Trifolium	199T_d2B	0.184	14.7	44
6	A	67	Wheat	67W_d1A	0.057	19.2	20
6	A	67	Wheat	67W_d1B	0.054	20.7	20
6	A	67	Wheat	67W_d2A	0.105	25.6	34
6	A	67	Wheat	67W_d2B	0.093	27	34
6	B	176	Wheat	176W_d1A	0.059	23.5	20
6	B	176	Wheat	176W_d1B	0.061	26.6	20
6	B	176	Wheat	176W_d2A	0.152	28.5	34
6	B	176	Wheat	176W_d2B	0.178	29.8	34
7	A	105	Arabidopsis	105A_d1A	0.006	-	33
7	A	105	Arabidopsis	105A_d1B	0.0007	-	33
7	A	105	Arabidopsis	105A_d2A	0.008	1.9	44
7	A	105	Arabidopsis	105A_d2B	0.007	11.8	44
7	B	202	Arabidopsis	202A_d1A	0.0006	-	33
7	B	202	Arabidopsis	202A_d1B	0.019	-	33
7	B	202	Arabidopsis	202A_d2A	0.0035	6.5	44
7	B	202	Arabidopsis	202A_d2B	0.056	18.4	44
7	A	73	Festuca	73F_d1A	0.009	11.7	47
7	A	73	Festuca	73F_d1B	0.056	23.7	47
7	A	73	Festuca	73F_d2A	0.113	26	63
7	A	73	Festuca	73F_d2B	0.01	11.1	63
7	B	184	Festuca	183F_d1A	0.025	16.8	47
7	B	184	Festuca	183F_d1B	0.073	28.7	47
7	B	184	Festuca	183F_d2A	0.096	25.8	63
7	B	184	Festuca	183F_d2B	0.073	16.5	63
7	A	53	Trifolium	53T_d1A	0.011	4.6	28
7	A	53	Trifolium	53T_d1B	0.017	6.1	28
7	A	53	Trifolium	53T_d2A	0.027	10	44
7	A	53	Trifolium	53T_d2B	0.029	6.2	44
7	B	139	Trifolium	139T_d1A	0.016	6.1	28
7	B	139	Trifolium	139T_d1B	0.013	7.4	28
7	B	139	Trifolium	139T_d2A	0.038	11.1	44
7	B	139	Trifolium	139T_d2B	0.043	9.5	44
7	A	100	Wheat	100W_d1A	0.054	23.9	20
7	A	100	Wheat	100W_d1B	0.062	24.2	20
7	A	100	Wheat	100W_d2A	0.113	32.7	34
7	A	100	Wheat	100W_d2B	0.101	30	34
7	B	173	Wheat	173W_d1A	0.045	19.1	20
7	B	173	Wheat	173W_d1B	0.036	21.4	20
7	B	173	Wheat	173W_d2A	0.102	31.1	34
7	B	173	Wheat	173W_d2B	0.074	29.7	34
8	A	8	Arabidopsis	8A_d1A	0.119	-	33
8	A	8	Arabidopsis	8A_d1B	0.006	-	33
8	A	8	Arabidopsis	8A_d2A	0.129	26.8	44
8	A	8	Arabidopsis	8A_d2B	0.128	28.3	44
8	B	104	Arabidopsis	104A_d1A	0.03	-	33
8	B	104	Arabidopsis	104A_d1B	0.078	-	33
8	B	104	Arabidopsis	104A_d2A	0.279	-	44
8	B	104	Arabidopsis	104A_d2B	0.257	17.2	44
8	A	159	Festuca	159F_d1A	0.011	10.5	47
8	A	159	Festuca	159F_d1B	0.0001	1.8	47
8	A	159	Festuca	159F_d2A	0.427	20.3	63
8	A	159	Festuca	159F_d2B	0.272	25.6	63
8	B	234	Festuca	234F_d1A	0.121	18.9	47
8	B	234	Festuca	234F_d1B	-	-	47
8	B	234	Festuca	234F_d2A	0.227	23.1	63
8	B	234	Festuca	234F_d2B	0.267	19.1	63
8	A	4	Trifolium	4T_d1A	0.054	13.6	28
8	A	4	Trifolium	4T_d1B	0.03	8.8	28
8	A	4	Trifolium	4T_d2A	0.286	20.5	44
8	A	4	Trifolium	4T_d2B	0.12	10.1	44
8	B	101	Trifolium	101T_d1A	0.046	11.2	28
8	B	101	Trifolium	101T_d1B	0.036	8.8	28
8	B	101	Trifolium	101T_d2A	0.384	21.7	44
8	B	101	Trifolium	101T_d2B	0.152	18.2	44
8	A	82	Wheat	82W_d1A	0.042	22.8	20
8	A	82	Wheat	82W_d1B	0.035	21.3	20
8	A	82	Wheat	82W_d2A	0.244	32.6	34
8	A	82	Wheat	82W_d2B	0.369	33.8	34
8	B	180	Wheat	180W_d1A	0.048	23.3	20
8	B	180	Wheat	180W_d1B	0.064	25.8	20
8	B	180	Wheat	180W_d2A	0.259	36.1	34
8	B	180	Wheat	180W_d2B	0.196	33.4	34
9	A	29	Arabidopsis	29A_d1A	0.0005	-	33
9	A	29	Arabidopsis	29A_d1B	0.0004	-	33
9	A	29	Arabidopsis	29A_d2A	0.0012	-	44
9	A	29	Arabidopsis	29A_d2B	0.038	15.9	44
9	B	130	Arabidopsis	130A_d1A	0.004	-	33
9	B	130	Arabidopsis	130A_d1B	0.009	-	33
9	B	130	Arabidopsis	130A_d2A	0.044	21.5	44
9	B	130	Arabidopsis	130A_d2B	0.025	-	44
9	A	113	Festuca	113F_d1A	0.1	28.2	47
9	A	113	Festuca	113F_d1B	0.031	15.5	47
9	A	113	Festuca	113F_d2A	0.033	19.3	63
9	A	113	Festuca	113F_d2B	0.072	13.5	63
9	B	129	Festuca	129F_d1A	0.087	19	47
9	B	129	Festuca	129F_d1B	0.08	24.3	47
9	B	129	Festuca	129F_d2A	0.148	21.1	63
9	B	129	Festuca	129F_d2B	0.039	16.7	63
9	A	47	Trifolium	47T_d1A	0.019	5.6	28
9	A	47	Trifolium	47T_d1B	0.014	6.4	28
9	A	47	Trifolium	47T_d2A	0.11	16.2	44
9	A	47	Trifolium	47T_d2B	0.079	11.6	44
9	B	244	Trifolium	244T_d1A	0.007	4	28
9	B	244	Trifolium	244T_d1B	0.022	7.5	28
9	B	244	Trifolium	244T_d2A	0.024	7.2	44
9	B	244	Trifolium	244T_d2B	0.018	6.5	44
9	A	66	Wheat	66W_d1A	0.079	26.6	20
9	A	66	Wheat	66W_d1B	0.063	25.6	20
9	A	66	Wheat	66W_d2A	0.166	33.8	34
9	A	66	Wheat	66W_d2B	0.199	35.6	34
9	B	174	Wheat	174W_d1A	0.053	21.4	20
9	B	174	Wheat	174W_d1B	0.02	12.7	20
9	B	174	Wheat	174W_d2A	0.093	26.3	34
9	B	174	Wheat	174W_d2B	0.204	30.2	34
10	A	162	Arabidopsis	162A_d1A	0.0005	-	33
10	A	162	Arabidopsis	162A_d1B	0.0012	-	33
10	A	162	Arabidopsis	162A_d2A	0.012	8.9	44
10	A	162	Arabidopsis	162A_d2B	0.019	-	44
10	B	166	Arabidopsis	166A_d1A	0.0017	-	33
10	B	166	Arabidopsis	166A_d1B	0.02	-	33
10	B	166	Arabidopsis	166A_d2A	0.076	8.5	44
10	B	166	Arabidopsis	166A_d2B	0.008	-	44
10	A	93	Festuca	93F_d1A	0.067	19.4	47
10	A	93	Festuca	93F_d1B	0.075	19.9	47
10	A	93	Festuca	93F_d2A	0.089	22.4	63
10	A	93	Festuca	93F_d2B	0.16	28.1	63
10	B	241	Festuca	241F_d1A	0.103	23.2	47
10	B	241	Festuca	241F_d1B	-	-	47
10	B	241	Festuca	241F_d2A	0.108	19.8	63
10	B	241	Festuca	241F_d2B	0.065	17.2	63
10	A	142	Trifolium	142T_d1A	0.015	6.6	28
10	A	142	Trifolium	142T_d1B	0.011	5.4	28
10	A	142	Trifolium	142T_d2A	0.016	6.9	44
10	A	142	Trifolium	142T_d2B	0.016	5.8	44
10	B	198	Trifolium	198T_d1A	0.015	7.7	28
10	B	198	Trifolium	198T_d1B	0.017	6.2	28
10	B	198	Trifolium	198T_d2A	0.059	10.3	44
10	B	198	Trifolium	198T_d2B	0.038	8.6	44
10	A	44	Wheat	44W_d1A	0.061	22.9	20
10	A	44	Wheat	44W_d1B	0.054	21.5	20
10	A	44	Wheat	44W_d2A	0.087	2.2	34
10	A	44	Wheat	44W_d2B	0.148	31.2	34
10	B	213	Wheat	213W_d1A	0.047	23	20
10	B	213	Wheat	213W_d1B	0.03	17.9	20
10	B	213	Wheat	213W_d2A	0.083	25.1	34
10	B	213	Wheat	213W_d2B	0.094	27.7	34
11	A	38	Arabidopsis	38A_d1A	0.0042	-	33
11	A	38	Arabidopsis	38A_d1B	0.0032	-	33
11	A	38	Arabidopsis	38A_d2A	0.02	3.9	44
11	A	38	Arabidopsis	38A_d2B	0.053	23.8	44
11	B	122	Arabidopsis	122A_d1A	0.008	-	33
11	B	122	Arabidopsis	122A_d1B	0.01	-	33
11	B	122	Arabidopsis	122A_d2A	0.014	16	44
11	B	122	Arabidopsis	122A_d2B	0.03	15.9	44
11	A	63	Festuca	63F_d1A	0.027	14.7	47
11	A	63	Festuca	63F_d1B	0.026	12.5	47
11	A	63	Festuca	63F_d2A	0.015	12.5	63
11	A	63	Festuca	63F_d2B	0.061	17.3	63
11	B	68	Festuca	68F_d1A	0.028	15.7	47
11	B	68	Festuca	68F_d1B	0.0003	0.2	47
11	B	68	Festuca	68F_d2A	0.125	23.9	63
11	B	68	Festuca	68F_d2B	0.22	28.3	63
11	A	31	Trifolium	31T_d1A	0.026	8.1	28
11	A	31	Trifolium	31T_d1B	0.016	6	28
11	A	31	Trifolium	31T_d2A	0.079	11.4	44
11	A	31	Trifolium	31T_d2B	0.06	11	44
11	B	58	Trifolium	58T_d1A	0.029	7.1	28
11	B	58	Trifolium	58T_d1B	0.031	8.2	28
11	B	58	Trifolium	58T_d2A	0.078	11.7	44
11	B	58	Trifolium	58T_d2B	0.045	9.8	44
11	A	133	Wheat	133W_d1A	0.081	23.6	20
11	A	133	Wheat	133W_d1B	0.068	23.8	20
11	A	133	Wheat	133W_d2A	0.154	30.9	34
11	A	133	Wheat	133W_d2B	0.114	28.5	34
11	B	192	Wheat	192W_d1A	0.098	25.8	20
11	B	192	Wheat	192W_d1B	0.096	26.5	20
11	B	192	Wheat	192W_d2A	0.132	30.1	34
11	B	192	Wheat	192W_d2B	0.169	32.4	34
12	A	7	Arabidopsis	7A_d1A	0.0002	-	33
12	A	7	Arabidopsis	7A_d1B	0.0003	-	33
12	A	7	Arabidopsis	7A_d2A	0.0047	-	44
12	A	7	Arabidopsis	7A_d2B	0.0002	-	44
12	B	205	Arabidopsis	205A_d1A	0.0001	-	33
12	B	205	Arabidopsis	205A_d1B	0.0009	-	33
12	B	205	Arabidopsis	205A_d2A	0.0008	-	44
12	B	205	Arabidopsis	205A_d2B	0.0009	-	44
12	A	112	Festuca	112F_d1A	0.002	7.4	47
12	A	112	Festuca	112F_d1B	0.007	14.9	47
12	A	112	Festuca	112F_d2A	0.01	11.4	63
12	A	112	Festuca	112F_d2B	0.007	9.6	63
12	B	216	Festuca	216F_d1A	0.003	7.8	47
12	B	216	Festuca	216F_d1B	0.006	8.7	47
12	B	216	Festuca	216F_d2A	0.045	21.8	63
12	B	216	Festuca	216F_d2B	0.013	9.6	63
12	A	46	Trifolium	46T_d1A	0.009	4.4	28
12	A	46	Trifolium	46T_d1B	0.011	4	28
12	A	46	Trifolium	46T_d2A	0.015	4.3	44
12	A	46	Trifolium	46T_d2B	0.008	3.4	44
12	B	161	Trifolium	161T_d1A	0.009	4	28
12	B	161	Trifolium	161T_d1B	0.01	3.3	28
12	B	161	Trifolium	161T_d2A	0.021	5	44
12	B	161	Trifolium	161T_d2B	0.016	7.2	44
12	A	217	Wheat	217W_d1A	0.059	21.5	20
12	A	217	Wheat	217W_d1B	0.055	21.2	20
12	A	217	Wheat	217W_d2A	0.09	31	34
12	A	217	Wheat	217W_d2B	0.122	30.5	34
12	B	231	Wheat	231W_d1A	0.067	23.1	20
12	B	231	Wheat	231W_d1B	0.061	20.7	20
12	B	231	Wheat	231W_d2A	0.073	23.7	34
12	B	231	Wheat	231W_d2B	0.059	22.2	34
13	A	60	Arabidopsis	60A_d1A	0.008	-	33
13	A	60	Arabidopsis	60A_d1B	0.003	-	33
13	A	60	Arabidopsis	60A_d2A	0.048	16.2	44
13	A	60	Arabidopsis	60A_d2B	0.036	-	44
13	B	83	Arabidopsis	83A_d1A	0.006	-	33
13	B	83	Arabidopsis	83A_d1B	0.006	-	33
13	B	83	Arabidopsis	83A_d2A	0.089	-	44
13	B	83	Arabidopsis	83A_d2B	0.033	11.5	44
13	A	11	Festuca	11F_d1A	0.101	18.2	47
13	A	11	Festuca	11F_d1B	0.029	16.6	47
13	A	11	Festuca	11F_d2A	0.161	20.1	63
13	A	11	Festuca	11F_d2B	0.099	30.5	63
13	B	30	Festuca	30F_d1A	0.016	7.9	47
13	B	30	Festuca	30F_d1B	0.005	6.2	47
13	B	30	Festuca	30F_d2A	0.014	9.9	63
13	B	30	Festuca	30F_d2B	0.038	14.8	63
13	A	50	Trifolium	50T_d1A	0.0008	2.1	28
13	A	50	Trifolium	50T_d1B	0.001	1.5	28
13	A	50	Trifolium	50T_d2A	0.02	8.1	44
13	A	50	Trifolium	50T_d2B	0.01	7.5	44
13	B	92	Trifolium	92T_d1A	0.01	4	28
13	B	92	Trifolium	92T_d1B	0.024	7.8	28
13	B	92	Trifolium	92T_d2A	0.04	10.7	44
13	B	92	Trifolium	92T_d2B	0.031	8.3	44
13	A	25	Wheat	25W_d1A	0.059	23.2	20
13	A	25	Wheat	25W_d1B	0.031	19.9	20
13	A	25	Wheat	25W_d2A	0.07	24.6	34
13	A	25	Wheat	25W_d2B	0.08	25.2	34
13	B	71	Wheat	71W_d1A	0.047	18.8	20
13	B	71	Wheat	71W_d1B	0.084	25.4	20
13	B	71	Wheat	71W_d2A	0.085	27	34
13	B	71	Wheat	71W_d2B	0.104	26.4	34
14	A	153	Arabidopsis	153A_d1A	0.0031	-	33
14	A	153	Arabidopsis	153A_d1B	0.044	-	33
14	A	153	Arabidopsis	153A_d2A	0.023	9.1	44
14	A	153	Arabidopsis	153A_d2B	0.008	14.2	44
14	B	197	Arabidopsis	197A_d1A	0.013	-	33
14	B	197	Arabidopsis	197A_d1B	0.008	-	33
14	B	197	Arabidopsis	197A_d2A	0.103	30.4	44
14	B	197	Arabidopsis	197A_d2B	0.106	37.9	44
14	A	218	Festuca	218F_d1A	0.0011	6.4	47
14	A	218	Festuca	218F_d1B	0.029	15.4	47
14	A	218	Festuca	218F_d2A	0.123	18.6	63
14	A	218	Festuca	218F_d2B	0.001	6.7	63
14	B	232	Festuca	232F_d1A	0.043	26.8	47
14	B	232	Festuca	232F_d1B	0.015	13	47
14	B	232	Festuca	232F_d2A	0.17	24.5	63
14	B	232	Festuca	232F_d2B	0.058	12.6	63
14	A	56	Trifolium	56T_d1A	0.08	12.8	28
14	A	56	Trifolium	56T_d1B	0.051	10.2	28
14	A	56	Trifolium	56T_d2A	0.067	12.7	44
14	A	56	Trifolium	56T_d2B	0.168	16.3	44
14	B	181	Trifolium	181T_d1A	0.06	10.7	28
14	B	181	Trifolium	181T_d1B	0.045	9.5	28
14	B	181	Trifolium	181T_d2A	0.374	21.5	44
14	B	181	Trifolium	181T_d2B	0.095	12.4	44
14	A	127	Wheat	127W_d1A	0.075	21.2	20
14	A	127	Wheat	127W_d1B	0.068	20.7	20
14	A	127	Wheat	127W_d2A	0.174	30.4	34
14	A	127	Wheat	127W_d2B	0.165	29	34
14	B	207	Wheat	207W_d1A	0.038	17.2	20
14	B	207	Wheat	207W_d1B	0.057	23.3	20
14	B	207	Wheat	207W_d2A	0.259	31.6	34
14	B	207	Wheat	207W_d2B	0.135	26.5	34
15	A	51	Arabidopsis	51A_d1A	0.014	-	33
15	A	51	Arabidopsis	51A_d1B	0.025	-	33
15	A	51	Arabidopsis	51A_d2A	0.032	20.7	44
15	A	51	Arabidopsis	51A_d2B	0.032	9.8	44
15	B	191	Arabidopsis	191A_d1A	0.117	-	33
15	B	191	Arabidopsis	191A_d1B	0.031	-	33
15	B	191	Arabidopsis	191A_d2A	0.096	25	44
15	B	191	Arabidopsis	191A_d2B	0.156	13.7	44
15	A	72	Festuca	72F_d1A	0.081	18.9	47
15	A	72	Festuca	72F_d1B	-	-	47
15	A	72	Festuca	72F_d2A	0.231	26.6	63
15	A	72	Festuca	72F_d2B	0.099	24.9	63
15	B	230	Festuca	230F_d1A	-	-	47
15	B	230	Festuca	230F_d1B	-	-	47
15	B	230	Festuca	230F_d2A	0.204	20.3	63
15	B	230	Festuca	230F_d2B	-	-	63
15	A	55	Trifolium	55T_d1A	0.045	10	28
15	A	55	Trifolium	55T_d1B	0.015	5.1	28
15	A	55	Trifolium	55T_d2A	0.257	14.2	44
15	A	55	Trifolium	55T_d2B	0.216	14.7	44
15	B	85	Trifolium	85T_d1A	0.039	10.2	28
15	B	85	Trifolium	85T_d1B	0.045	9.2	28
15	B	85	Trifolium	85T_d2A	0.155	16.2	44
15	B	85	Trifolium	85T_d2B	0.246	15.1	44
15	A	35	Wheat	35W_d1A	0.051	22.2	20
15	A	35	Wheat	35W_d1B	0.064	23.7	20
15	A	35	Wheat	35W_d2A	0.144	28.3	34
15	A	35	Wheat	35W_d2B	0.131	26.1	34
15	B	37	Wheat	37W_d1A	0.09	23.2	20
15	B	37	Wheat	37W_d1B	0.076	22.9	20
15	B	37	Wheat	37W_d2A	0.08	23.6	34
15	B	37	Wheat	37W_d2B	0.106	24.5	34
16	A	70	Arabidopsis	70A_d1A	0.015	-	33
16	A	70	Arabidopsis	70A_d1B	0.021	-	33
16	A	70	Arabidopsis	70A_d2A	0.169	26	44
16	A	70	Arabidopsis	70A_d2B	0.048	8.9	44
16	B	185	Arabidopsis	185A_d1A	0.003	-	33
16	B	185	Arabidopsis	185A_d1B	0.008	-	33
16	B	185	Arabidopsis	185A_d2A	0.022	14	44
16	B	185	Arabidopsis	185A_d2B	0.04	-	44
16	A	106	Festuca	106F_d1A	0.003	10	47
16	A	106	Festuca	106F_d1B	0.065	26.7	47
16	A	106	Festuca	106F_d2A	0.189	26.7	63
16	A	106	Festuca	106F_d2B	0.001	6	63
16	B	196	Festuca	196F_d1A	0.055	25.8	47
16	B	196	Festuca	196F_d1B	0.124	19.6	47
16	B	196	Festuca	196F_d2A	0.06	16	63
16	B	196	Festuca	196F_d2B	0.226	29.8	63
16	A	152	Trifolium	152T_d1A	0.024	7.7	28
16	A	152	Trifolium	152T_d1B	0.031	9	28
16	A	152	Trifolium	152T_d2A	0.151	14.5	44
16	A	152	Trifolium	152T_d2B	0.117	12.1	44
16	B	222	Trifolium	222T_d1A	0.098	12.5	28
16	B	222	Trifolium	222T_d1B	0.073	11.4	28
16	B	222	Trifolium	222T_d2A	0.152	14.3	44
16	B	222	Trifolium	222T_d2B	0.213	14.6	44
16	A	18	Wheat	18W_d1A	0.069	24.6	20
16	A	18	Wheat	18W_d1B	0.064	22.7	20
16	A	18	Wheat	18W_d2A	0.17	31.2	34
16	A	18	Wheat	18W_d2B	0.166	30.1	34
16	B	147	Wheat	147W_d1A	0.08	27.2	20
16	B	147	Wheat	147W_d1B	0.076	25.3	20
16	B	147	Wheat	147W_d2A	0.222	35.2	34
16	B	147	Wheat	147W_d2B	0.168	29.8	34
17	A	75	Arabidopsis	75A_d1A	0.026	-	33
17	A	75	Arabidopsis	75A_d1B	0.034	-	33
17	A	75	Arabidopsis	75A_d2A	0.081	31.7	44
17	A	75	Arabidopsis	75A_d2B	0.078	19.9	44
17	B	88	Arabidopsis	88A_d1A	0.06	-	33
17	B	88	Arabidopsis	88A_d1B	0.028	-	33
17	B	88	Arabidopsis	88A_d2A	0.044	24.2	44
17	B	88	Arabidopsis	88A_d2B	0.078	32.9	44
17	A	5	Festuca	5F_d1A	0.0005	1.7	47
17	A	5	Festuca	5F_d1B	0.12	27.1	47
17	A	5	Festuca	5F_d2A	0.226	31.5	63
17	A	5	Festuca	5F_d2B	0.03	17.4	63
17	B	141	Festuca	141F_d1A	0.053	16.1	47
17	B	141	Festuca	141F_d1B	0.057	19.9	47
17	B	141	Festuca	141F_d2A	0.126	20.8	63
17	B	141	Festuca	141F_d2B	0.139	16.2	63
17	A	15	Trifolium	15T_d1A	0.094	12.5	28
17	A	15	Trifolium	15T_d1B	0.085	13.5	28
17	A	15	Trifolium	15T_d2A	0.202	13.2	44
17	A	15	Trifolium	15T_d2B	0.225	14.6	44
17	B	172	Trifolium	172T_d1A	0.033	10.7	28
17	B	172	Trifolium	172T_d1B	0.06	12	28
17	B	172	Trifolium	172T_d2A	0.378	18.1	44
17	B	172	Trifolium	172T_d2B	0.175	12.6	44
17	A	102	Wheat	102W_d1A	0.098	26.3	20
17	A	102	Wheat	102W_d1B	0.093	24.3	20
17	A	102	Wheat	102W_d2A	0.213	32	34
17	A	102	Wheat	102W_d2B	0.252	33.2	34
17	B	219	Wheat	219W_d1A	0.075	23.2	20
17	B	219	Wheat	219W_d1B	0.075	23.1	20
17	B	219	Wheat	219W_d2A	0.122	28.6	34
17	B	219	Wheat	219W_d2B	0.107	26.9	34
18	A	12	Arabidopsis	12A_d1A	0.002	-	33
18	A	12	Arabidopsis	12A_d1B	0.08	-	33
18	A	12	Arabidopsis	12A_d2A	0.093	35.9	44
18	A	12	Arabidopsis	12A_d2B	0.035	-	44
18	B	57	Arabidopsis	57A_d1A	0.04	-	33
18	B	57	Arabidopsis	57A_d1B	0.077	-	33
18	B	57	Arabidopsis	57A_d2A	0.093	35.1	44
18	B	57	Arabidopsis	57A_d2B	0.053	30.9	44
18	A	91	Festuca	91F_d1A	0.119	27.7	47
18	A	91	Festuca	91F_d1B	0.111	27.3	47
18	A	91	Festuca	91F_d2A	0.083	15.3	63
18	A	91	Festuca	91F_d2B	0.069	17.5	63
18	B	220	Festuca	220F_d1A	-	-	47
18	B	220	Festuca	220F_d1B	-	-	47
18	B	220	Festuca	220F_d2A	0.073	19.1	63
18	B	220	Festuca	220F_d2B	-	-	63
18	A	17	Trifolium	17T_d1A	0.028	7.5	28
18	A	17	Trifolium	17T_d1B	0.043	9.2	28
18	A	17	Trifolium	17T_d2A	0.11	14.5	44
18	A	17	Trifolium	17T_d2B	0.174	12.7	44
18	B	61	Trifolium	61T_d1A	0.096	15.3	28
18	B	61	Trifolium	61T_d1B	0.039	9.9	28
18	B	61	Trifolium	61T_d2A	0.213	15	44
18	B	61	Trifolium	61T_d2B	0.289	16.2	44
18	A	54	Wheat	54W_d1A	0.089	23.5	20
18	A	54	Wheat	54W_d1B	0.074	22.8	20
18	A	54	Wheat	54W_d2A	0.251	34	34
18	A	54	Wheat	54W_d2B	0.218	30	34
18	B	177	Wheat	177W_d1A	0.025	17.4	20
18	B	177	Wheat	177W_d1B	0.083	22.7	20
18	B	177	Wheat	177W_d2A	0.115	27.1	34
18	B	177	Wheat	177W_d2B	0.175	30.3	34
19	A	203	Arabidopsis	203A_d1A	0.012	-	33
19	A	203	Arabidopsis	203A_d1B	0.003	-	33
19	A	203	Arabidopsis	203A_d2A	0.074	19.9	44
19	A	203	Arabidopsis	203A_d2B	0.059	-	44
19	B	226	Arabidopsis	226A_d1A	0.03	-	33
19	B	226	Arabidopsis	226A_d1B	0.009	-	33
19	B	226	Arabidopsis	226A_d2A	0.073	22.9	44
19	B	226	Arabidopsis	226A_d2B	0.012	-	44
19	A	125	Festuca	125F_d1A	0.089	28.3	47
19	A	125	Festuca	125F_d1B	0.08	28	47
19	A	125	Festuca	125F_d2A	0.085	22.4	63
19	A	125	Festuca	125F_d2B	0.064	18.7	63
19	B	236	Festuca	236F_d1A	0.062	18.5	47
19	B	236	Festuca	236F_d1B	0.067	17.6	47
19	B	236	Festuca	236F_d2A	0.12	21.5	63
19	B	236	Festuca	236F_d2B	0.065	16.3	63
19	A	41	Trifolium	41T_d1A	0.029	8.1	28
19	A	41	Trifolium	41T_d1B	0.05	9.7	28
19	A	41	Trifolium	41T_d2A	0.158	14.2	44
19	A	41	Trifolium	41T_d2B	0.147	13.3	44
19	B	136	Trifolium	136T_d1A	0.049	10.1	28
19	B	136	Trifolium	136T_d1B	0.042	7.5	28
19	B	136	Trifolium	136T_d2A	0.267	14.6	44
19	B	136	Trifolium	136T_d2B	0.208	15.5	44
19	A	155	Wheat	155W_d1A	0.106	27.4	20
19	A	155	Wheat	155W_d1B	0.083	25.9	20
19	A	155	Wheat	155W_d2A	0.17	31.3	34
19	A	155	Wheat	155W_d2B	0.208	32.3	34
19	B	194	Wheat	194W_d1A	0.072	27.3	20
19	B	194	Wheat	194W_d1B	0.061	24	20
19	B	194	Wheat	194W_d2A	0.195	31.2	34
19	B	194	Wheat	194W_d2B	0.185	29.3	34
20	A	43	Arabidopsis	43A_d1A	0.007	-	33
20	A	43	Arabidopsis	43A_d1B	0.023	-	33
20	A	43	Arabidopsis	43A_d2A	0.026	-	44
20	A	43	Arabidopsis	43A_d2B	0.034	-	44
20	B	52	Arabidopsis	52A_d1A	0.016	-	33
20	B	52	Arabidopsis	52A_d1B	0.014	-	33
20	B	52	Arabidopsis	52A_d2A	0.024	21	44
20	B	52	Arabidopsis	52A_d2B	0.091	38.4	44
20	A	27	Festuca	27F_d1A	0.006	7.5	47
20	A	27	Festuca	27F_d1B	0.026	18.7	47
20	A	27	Festuca	27F_d2A	0.098	29.3	63
20	A	27	Festuca	27F_d2B	0.248	30.3	63
20	B	110	Festuca	110F_d1A	0.016	14	47
20	B	110	Festuca	110F_d1B	-	-	47
20	B	110	Festuca	110F_d2A	0.2	21.6	63
20	B	110	Festuca	110F_d2B	-	-	63
20	A	151	Trifolium	151T_d1A	0.036	11.7	28
20	A	151	Trifolium	151T_d1B	0.033	8.5	28
20	A	151	Trifolium	151T_d2A	0.23	17.9	44
20	A	151	Trifolium	151T_d2B	0.307	17.9	44
20	B	204	Trifolium	204T_d1A	0.045	10	28
20	B	204	Trifolium	204T_d1B	0.014	6.5	28
20	B	204	Trifolium	204T_d2A	0.192	17	44
20	B	204	Trifolium	204T_d2B	0.247	15.8	44
20	A	170	Wheat	170W_d1A	0.072	23.3	20
20	A	170	Wheat	170W_d1B	0.097	27.9	20
20	A	170	Wheat	170W_d2A	0.193	32.1	34
20	A	170	Wheat	170W_d2B	0.152	28.9	34
20	B	233	Wheat	233W_d1A	0.06	22.9	20
20	B	233	Wheat	233W_d1B	0.064	23	20
20	B	233	Wheat	233W_d2A	0.127	28	34
20	B	233	Wheat	233W_d2B	0.156	30.7	34
21	A	169	Arabidopsis	169A_d1A	0.001	-	33
21	A	169	Arabidopsis	169A_d1B	0.005	-	33
21	A	169	Arabidopsis	169A_d2A	0.006	8.4	44
21	A	169	Arabidopsis	169A_d2B	0.025	22.7	44
21	B	237	Arabidopsis	237A_d1A	0.023	-	33
21	B	237	Arabidopsis	237A_d1B	0.0033	-	33
21	B	237	Arabidopsis	237A_d2A	0.035	21	44
21	B	237	Arabidopsis	237A_d2B	-	-	44
21	A	59	Festuca	59F_d1A	0.039	22.5	47
21	A	59	Festuca	59F_d1B	0.005	13.7	47
21	A	59	Festuca	59F_d2A	0.024	18.7	63
21	A	59	Festuca	59F_d2B	0.046	15.6	63
21	B	87	Festuca	87F_d1A	0.016	10.4	47
21	B	87	Festuca	87F_d1B	0.042	17.5	47
21	B	87	Festuca	87F_d2A	0.073	28	63
21	B	87	Festuca	87F_d2B	0.052	19.3	63
21	A	2	Trifolium	2T_d1A	0.033	8.8	28
21	A	2	Trifolium	2T_d1B	0.049	11.6	28
21	A	2	Trifolium	2T_d2A	0.1	12.1	44
21	A	2	Trifolium	2T_d2B	0.166	13.9	44
21	B	39	Trifolium	39T_d1A	0.024	9.3	28
21	B	39	Trifolium	39T_d1B	0.024	7.7	28
21	B	39	Trifolium	39T_d2A	0.096	12.6	44
21	B	39	Trifolium	39T_d2B	0.162	15.2	44
21	A	97	Wheat	97W_d1A	0.057	20.5	20
21	A	97	Wheat	97W_d1B	0.095	23.2	20
21	A	97	Wheat	97W_d2A	0.075	19.4	34
21	A	97	Wheat	97W_d2B	0.074	22.5	34
21	B	138	Wheat	138W_d1A	0.062	21.6	20
21	B	138	Wheat	138W_d1B	0.066	21.1	20
21	B	138	Wheat	138W_d2A	0.107	25.5	34
21	B	138	Wheat	138W_d2B	0.106	25.9	34
22	A	16	Arabidopsis	16A_d1A	0.03	-	33
22	A	16	Arabidopsis	16A_d1B	-	-	33
22	A	16	Arabidopsis	16A_d2A	0.14	16.4	44
22	A	16	Arabidopsis	16A_d2B	0.043	20.8	44
22	B	65	Arabidopsis	65A_d1A	0.0015	-	33
22	B	65	Arabidopsis	65A_d1B	0.002	-	33
22	B	65	Arabidopsis	65A_d2A	0.058	5.1	44
22	B	65	Arabidopsis	65A_d2B	-	-	44
22	A	115	Festuca	115F_d1A	0.001	3.7	47
22	A	115	Festuca	115F_d1B	0.054	26.2	47
22	A	115	Festuca	115F_d2A	0.172	23.8	63
22	A	115	Festuca	115F_d2B	0.121	21.2	63
22	B	239	Festuca	239F_d1A	0.104	21.4	47
22	B	239	Festuca	239F_d1B	0.003	7.6	47
22	B	239	Festuca	239F_d2A	0.105	25.6	63
22	B	239	Festuca	239F_d2B	0.08	16.2	63
22	A	164	Trifolium	164T_d1A	0.038	9.2	28
22	A	164	Trifolium	164T_d1B	0.06	11.5	28
22	A	164	Trifolium	164T_d2A	0.163	14.1	44
22	A	164	Trifolium	164T_d2B	0.285	15.6	44
22	B	228	Trifolium	228T_d1A	0.064	11.8	28
22	B	228	Trifolium	228T_d1B	0.053	8.3	28
22	B	228	Trifolium	228T_d2A	0.188	14	44
22	B	228	Trifolium	228T_d2B	0.166	13.5	44
22	A	114	Wheat	114W_d1A	0.092	27.2	20
22	A	114	Wheat	114W_d1B	0.085	27.7	20
22	A	114	Wheat	114W_d2A	0.231	36.6	34
22	A	114	Wheat	114W_d2B	0.289	33.6	34
22	B	210	Wheat	210W_d1A	0.081	24.9	20
22	B	210	Wheat	210W_d1B	0.088	24.5	20
22	B	210	Wheat	210W_d2A	0.146	28.7	34
22	B	210	Wheat	210W_d2B	0.128	29.9	34
23	A	214	Arabidopsis	214A_d1A	0.0009	-	33
23	A	214	Arabidopsis	214A_d1B	0.008	-	33
23	A	214	Arabidopsis	214A_d2A	0.036	-	44
23	A	214	Arabidopsis	214A_d2B	0.008	8.4	44
23	B	246	Arabidopsis	246A_d1A	0.01	-	33
23	B	246	Arabidopsis	246A_d1B	0.005	-	33
23	B	246	Arabidopsis	246A_d2A	0.031	16.9	44
23	B	246	Arabidopsis	246A_d2B	0.017	17.3	44
23	A	117	Festuca	117F_d1A	0.015	12.6	47
23	A	117	Festuca	117F_d1B	0.008	7.2	47
23	A	117	Festuca	117F_d2A	0.038	20.1	63
23	A	117	Festuca	117F_d2B	0.043	22.3	63
23	B	248	Festuca	248F_d1A	0.041	20.2	47
23	B	248	Festuca	248F_d1B	0.016	18.4	47
23	B	248	Festuca	248F_d2A	0.032	19.9	63
23	B	248	Festuca	248F_d2B	0.093	16.6	63
23	A	140	Trifolium	140T_d1A	0.052	11.3	28
23	A	140	Trifolium	140T_d1B	0.039	10.2	28
23	A	140	Trifolium	140T_d2A	0.238	15.5	44
23	A	140	Trifolium	140T_d2B	0.219	14.4	44
23	B	187	Trifolium	187T_d1A	0.059	12.4	28
23	B	187	Trifolium	187T_d1B	0.044	10.4	28
23	B	187	Trifolium	187T_d2A	0.278	17.2	44
23	B	187	Trifolium	187T_d2B	0.117	13.1	44
23	A	33	Wheat	33W_d1A	0.054	18.8	20
23	A	33	Wheat	33W_d1B	0.056	19.7	20
23	A	33	Wheat	33W_d2A	0.084	20.4	34
23	A	33	Wheat	33W_d2B	0.075	19.7	34
23	B	158	Wheat	158W_d1A	0.08	26.6	20
23	B	158	Wheat	158W_d1B	0.092	32.6	20
23	B	158	Wheat	158W_d2A	0.233	32.4	34
23	B	158	Wheat	158W_d2B	0.296	32.4	34
24	A	79	Arabidopsis	79A_d1A	0.0007	-	33
24	A	79	Arabidopsis	79A_d1B	0.042	-	33
24	A	79	Arabidopsis	79A_d2A	0.003	-	44
24	A	79	Arabidopsis	79A_d2B	0.003	-	44
24	B	243	Arabidopsis	243A_d1A	0.01	-	33
24	B	243	Arabidopsis	243A_d1B	0.02	-	33
24	B	243	Arabidopsis	243A_d2A	0.064	12.9	44
24	B	243	Arabidopsis	243A_d2B	0.038	17	44
24	A	6	Festuca	6F_d1A	0.069	20.8	47
24	A	6	Festuca	6F_d1B	0.021	14.1	47
24	A	6	Festuca	6F_d2A	0.041	22.2	63
24	A	6	Festuca	6F_d2B	0.026	17.3	63
24	B	128	Festuca	128F_d1A	0.003	6.8	47
24	B	128	Festuca	128F_d1B	0.046	18.4	47
24	B	128	Festuca	128F_d2A	0.025	12.6	63
24	B	128	Festuca	128F_d2B	0.085	22.9	63
24	A	96	Trifolium	96T_d1A	0.033	10.5	28
24	A	96	Trifolium	96T_d1B	0.045	9.5	28
24	A	96	Trifolium	96T_d2A	0.108	16.7	44
24	A	96	Trifolium	96T_d2B	0.246	11.5	44
24	B	182	Trifolium	182T_d1A	0.03	7.1	28
24	B	182	Trifolium	182T_d1B	0.056	9.8	28
24	B	182	Trifolium	182T_d2A	0.226	16.3	44
24	B	182	Trifolium	182T_d2B	0.148	17.1	44
24	A	3	Wheat	3W_d1A	0.082	21.6	20
24	A	3	Wheat	3W_d1B	0.067	23	20
24	A	3	Wheat	3W_d2A	0.176	28.4	34
24	A	3	Wheat	3W_d2B	0.238	31	34
24	B	28	Wheat	28W_d1A	0.077	21.6	20
24	B	28	Wheat	28W_d1B	0.069	21.4	20
24	B	28	Wheat	28W_d2A	0.102	23	34
24	B	28	Wheat	28W_d2B	0.116	26.3	34
25	A	201	Arabidopsis	201A_d1A	0.0014	-	33
25	A	201	Arabidopsis	201A_d1B	0.008	-	33
25	A	201	Arabidopsis	201A_d2A	0.051	18.2	44
25	A	201	Arabidopsis	201A_d2B	0.046	26.5	44
25	B	225	Arabidopsis	225A_d1A	0.027	-	33
25	B	225	Arabidopsis	225A_d1B	0.0024	-	33
25	B	225	Arabidopsis	225A_d2A	0.025	14.7	44
25	B	225	Arabidopsis	225A_d2B	0.019	11.8	44
25	A	137	Festuca	137F_d1A	0.016	12.9	47
25	A	137	Festuca	137F_d1B	0.086	29.9	47
25	A	137	Festuca	137F_d2A	0.089	25	63
25	A	137	Festuca	137F_d2B	0.049	15.9	63
25	B	156	Festuca	156F_d1A	0.058	15	47
25	B	156	Festuca	156F_d1B	0.009	9.6	47
25	B	156	Festuca	156F_d2A	0.103	19	63
25	B	156	Festuca	156F_d2B	0.065	18.4	63
25	A	10	Trifolium	10T_d1A	0.016	7.5	28
25	A	10	Trifolium	10T_d1B	0.026	8.3	28
25	A	10	Trifolium	10T_d2A	0.063	9.7	44
25	A	10	Trifolium	10T_d2B	0.043	8.2	44
25	B	235	Trifolium	235T_d1A	0.014	8.5	28
25	B	235	Trifolium	235T_d1B	0.024	8.1	28
25	B	235	Trifolium	235T_d2A	0.095	13.5	44
25	B	235	Trifolium	235T_d2B	0.128	16.5	44
25	A	103	Wheat	103W_d1A	0.106	26.7	20
25	A	103	Wheat	103W_d1B	0.089	26.5	20
25	A	103	Wheat	103W_d2A	0.163	32.7	34
25	A	103	Wheat	103W_d2B	0.17	30.8	34
25	B	131	Wheat	131W_d1A	0.084	25.1	20
25	B	131	Wheat	131W_d1B	0.086	23.4	20
25	B	131	Wheat	131W_d2A	0.099	28.9	34
25	B	131	Wheat	131W_d2B	0.096	28.3	34
26	A	134	Arabidopsis	134A_d1A	0.0034	-	33
26	A	134	Arabidopsis	134A_d1B	0.017	-	33
26	A	134	Arabidopsis	134A_d2A	0.016	13.7	44
26	A	134	Arabidopsis	134A_d2B	0.06	27.3	44
26	B	150	Arabidopsis	150A_d1A	0.031	-	33
26	B	150	Arabidopsis	150A_d1B	0.044	-	33
26	B	150	Arabidopsis	150A_d2A	0.07	-	44
26	B	150	Arabidopsis	150A_d2B	0.018	15.1	44
26	A	13	Festuca	13F_d1A	0.008	6.3	47
26	A	13	Festuca	13F_d1B	0.078	16.5	47
26	A	13	Festuca	13F_d2A	0.052	17.5	63
26	A	13	Festuca	13F_d2B	0.008	9.7	63
26	B	45	Festuca	45F_d1A	0.063	24.3	47
26	B	45	Festuca	45F_d1B	0.042	17.2	47
26	B	45	Festuca	45F_d2A	0.061	26	63
26	B	45	Festuca	45F_d2B	0.085	23.6	63
26	A	90	Trifolium	90T_d1A	0.058	9.4	28
26	A	90	Trifolium	90T_d1B	0.115	14.7	28
26	A	90	Trifolium	90T_d2A	0.218	11.5	44
26	A	90	Trifolium	90T_d2B	0.238	14.2	44
26	B	195	Trifolium	195T_d1A	0.064	10.8	28
26	B	195	Trifolium	195T_d1B	0.055	11.8	28
26	B	195	Trifolium	195T_d2A	0.202	20.1	44
26	B	195	Trifolium	195T_d2B	0.183	16.5	44
26	A	20	Wheat	20W_d1A	0.052	21.5	20
26	A	20	Wheat	20W_d1B	0.049	22.9	20
26	A	20	Wheat	20W_d2A	0.131	28.5	34
26	A	20	Wheat	20W_d2B	0.107	25.9	34
26	B	42	Wheat	42W_d1A	0.05	21.2	20
26	B	42	Wheat	42W_d1B	0.067	24	20
26	B	42	Wheat	42W_d2A	0.088	24.7	34
26	B	42	Wheat	42W_d2B	0.101	26.8	34
27	A	109	Arabidopsis	109A_d1A	0.043	-	33
27	A	109	Arabidopsis	109A_d1B	0.03	-	33
27	A	109	Arabidopsis	109A_d2A	0.077	22.4	44
27	A	109	Arabidopsis	109A_d2B	0.052	15.3	44
27	B	227	Arabidopsis	227A_d1A	0.031	-	33
27	B	227	Arabidopsis	227A_d1B	0.014	-	33
27	B	227	Arabidopsis	227A_d2A	0.043	17.3	44
27	B	227	Arabidopsis	227A_d2B	0.001	6.6	44
27	A	116	Festuca	116F_d1A	0.0006	2.3	47
27	A	116	Festuca	116F_d1B	0.078	18.7	47
27	A	116	Festuca	116F_d2A	0.078	19	63
27	A	116	Festuca	116F_d2B	0.056	19.1	63
27	B	145	Festuca	145F_d1A	0.044	19.8	47
27	B	145	Festuca	145F_d1B	0.052	21.7	47
27	B	145	Festuca	145F_d2A	0.004	9.2	63
27	B	145	Festuca	145F_d2B	0.07	23.1	63
27	A	160	Trifolium	160T_d1A	0.058	9	28
27	A	160	Trifolium	160T_d1B	0.048	8.9	28
27	A	160	Trifolium	160T_d2A	0.079	12.2	44
27	A	160	Trifolium	160T_d2B	0.2	14.7	44
27	B	209	Trifolium	209T_d1A	0.052	9.5	28
27	B	209	Trifolium	209T_d1B	0.051	10	28
27	B	209	Trifolium	209T_d2A	0.216	13.9	44
27	B	209	Trifolium	209T_d2B	0.18	13.1	44
27	A	186	Wheat	186W_d1A	0.071	23.1	20
27	A	186	Wheat	186W_d1B	0.072	20.3	20
27	A	186	Wheat	186W_d2A	0.274	32	34
27	A	186	Wheat	186W_d2B	0.197	31.1	34
27	B	188	Wheat	188W_d1A	0.058	22	20
27	B	188	Wheat	188W_d1B	0.056	23.9	20
27	B	188	Wheat	188W_d2A	0.124	29	34
27	B	188	Wheat	188W_d2B	0.096	22.4	34
28	A	48	Arabidopsis	48A_d1A	0.052	-	33
28	A	48	Arabidopsis	48A_d1B	0.038	-	33
28	A	48	Arabidopsis	48A_d2A	0.048	17.8	44
28	A	48	Arabidopsis	48A_d2B	0.037	16.8	44
28	B	215	Arabidopsis	215A_d1A	0.045	-	33
28	B	215	Arabidopsis	215A_d1B	0.05	-	33
28	B	215	Arabidopsis	215A_d2A	0.089	29.7	44
28	B	215	Arabidopsis	215A_d2B	0.131	21.9	44
28	A	108	Festuca	108F_d1A	0.036	17.8	47
28	A	108	Festuca	108F_d1B	0.093	22.8	47
28	A	108	Festuca	108F_d2A	0.346	34.7	63
28	A	108	Festuca	108F_d2B	0.037	11.9	63
28	B	211	Festuca	211F_d1A	0.111	29.2	47
28	B	211	Festuca	211F_d1B	-	-	47
28	B	211	Festuca	211F_d2A	0.066	21.3	63
28	B	211	Festuca	211F_d2B	0.15	24.6	63
28	A	165	Trifolium	165T_d1A	0.024	9.1	28
28	A	165	Trifolium	165T_d1B	0.022	8	28
28	A	165	Trifolium	165T_d2A	0.046	10.2	44
28	A	165	Trifolium	165T_d2B	0.11	13.2	44
28	B	183	Trifolium	183T_d1A	0.033	7.1	28
28	B	183	Trifolium	183T_d1B	0.046	10.9	28
28	B	183	Trifolium	183T_d2A	0.184	15.2	44
28	B	183	Trifolium	183T_d2B	0.201	15	44
28	A	98	Wheat	98W_d1A	0.066	20.2	20
28	A	98	Wheat	98W_d1B	0.064	23.8	20
28	A	98	Wheat	98W_d2A	0.146	31.9	34
28	A	98	Wheat	98W_d2B	0.146	33.3	34
28	B	223	Wheat	223W_d1A	0.072	25.6	20
28	B	223	Wheat	223W_d1B	0.043	21.7	20
28	B	223	Wheat	223W_d2A	0.119	29.6	34
28	B	223	Wheat	223W_d2B	0.113	29	34
29	A	14	Arabidopsis	14A_d1A	0.019	-	33
29	A	14	Arabidopsis	14A_d1B	0.032	-	33
29	A	14	Arabidopsis	14A_d2A	0.157	31.3	44
29	A	14	Arabidopsis	14A_d2B	0.051	23.1	44
29	B	171	Arabidopsis	171A_d1A	0.024	-	33
29	B	171	Arabidopsis	171A_d1B	0.048	-	33
29	B	171	Arabidopsis	171A_d2A	0.036	18.3	44
29	B	171	Arabidopsis	171A_d2B	0.059	4.8	44
29	A	19	Festuca	19F_d1A	0.048	22.8	47
29	A	19	Festuca	19F_d1B	0.068	20.3	47
29	A	19	Festuca	19F_d2A	0.046	21.6	63
29	A	19	Festuca	19F_d2B	0.122	27.8	63
29	B	149	Festuca	149F_d1A	0.0006	3.6	47
29	B	149	Festuca	149F_d1B	-	-	47
29	B	149	Festuca	149F_d2A	0.118	19.1	63
29	B	149	Festuca	149F_d2B	-	-	63
29	A	123	Trifolium	123T_d1A	0.03	8.4	28
29	A	123	Trifolium	123T_d1B	0.03	7.8	28
29	A	123	Trifolium	123T_d2A	0.152	18	44
29	A	123	Trifolium	123T_d2B	0.111	16.2	44
29	B	124	Trifolium	124T_d1A	0.038	9.5	28
29	B	124	Trifolium	124T_d1B	0.034	8.6	28
29	B	124	Trifolium	124T_d2A	0.16	16.7	44
29	B	124	Trifolium	124T_d2B	0.081	14.5	44
29	A	34	Wheat	34W_d1A	0.076	24.6	20
29	A	34	Wheat	34W_d1B	0.089	23.4	20
29	A	34	Wheat	34W_d2A	0.109	27.8	34
29	A	34	Wheat	34W_d2B	0.17	31.5	34
29	B	167	Wheat	167W_d1A	0.059	22.2	20
29	B	167	Wheat	167W_d1B	0.122	28.1	20
29	B	167	Wheat	167W_d2A	0.158	29.3	34
29	B	167	Wheat	167W_d2B	0.105	29.8	34
30	A	9	Arabidopsis	9A_d1A	0.007	-	33
30	A	9	Arabidopsis	9A_d1B	0.025	-	33
30	A	9	Arabidopsis	9A_d2A	0.011	10.6	44
30	A	9	Arabidopsis	9A_d2B	0.017	14.6	44
30	B	247	Arabidopsis	247A_d1A	0.034	-	33
30	B	247	Arabidopsis	247A_d1B	0.02	-	33
30	B	247	Arabidopsis	247A_d2A	0.04	19.6	44
30	B	247	Arabidopsis	247A_d2B	0.025	9.8	44
30	A	148	Festuca	148F_d1A	0.051	11.9	47
30	A	148	Festuca	148F_d1B	0.009	19.3	47
30	A	148	Festuca	148F_d2A	0.054	18.3	63
30	A	148	Festuca	148F_d2B	0.029	17.2	63
30	B	175	Festuca	175F_d1A	0.035	17.9	47
30	B	175	Festuca	175F_d1B	0.022	19	47
30	B	175	Festuca	175F_d2A	0.062	17.9	63
30	B	175	Festuca	175F_d2B	0.1	17.8	63
30	A	168	Trifolium	168T_d1A	0.02	8.2	28
30	A	168	Trifolium	168T_d1B	0.013	4.3	28
30	A	168	Trifolium	168T_d2A	0.108	12.5	44
30	A	168	Trifolium	168T_d2B	0.06	9.7	44
30	B	224	Trifolium	224T_d1A	0.022	8.2	28
30	B	224	Trifolium	224T_d1B	0.029	8.7	28
30	B	224	Trifolium	224T_d2A	0.113	10.3	44
30	B	224	Trifolium	224T_d2B	0.167	15.3	44
30	A	135	Wheat	135W_d1A	0.06	21.9	20
30	A	135	Wheat	135W_d1B	0.072	24	20
30	A	135	Wheat	135W_d2A	0.129	29.4	34
30	A	135	Wheat	135W_d2B	0.118	28.5	34
30	B	212	Wheat	212W_d1A	0.067	23.4	20
30	B	212	Wheat	212W_d1B	0.047	21.9	20
30	B	212	Wheat	212W_d2A	0.098	27.1	34
30	B	212	Wheat	212W_d2B	0.091	27.2	34

## Sheet: Data experiment 2
Soil	Rep	Pot	Species	Individu	Mass_in_g	length_in_cm	Age_day	Fertilized
Clay	A	33	Arabidopsis	33A_d1A	-	-	33	Controle
Clay	A	33	Arabidopsis	33A_d1B	-	-	33	Controle
Clay	A	33	Arabidopsis	33A_d2A	0.074	1.5	44	Controle
Clay	A	33	Arabidopsis	33A_d2B	-	-	44	Controle
Clay	B	69	Arabidopsis	69A_d1A	0.0038	-	33	Controle
Clay	B	69	Arabidopsis	69A_d1B	0.0003	-	33	Controle
Clay	B	69	Arabidopsis	69A_d2A	0.065	3.9	44	Controle
Clay	B	69	Arabidopsis	69A_d2B	0.026	10.4	44	Controle
Clay	A	21	Arabidopsis	21A_d1A	0.028	-	33	High
Clay	A	21	Arabidopsis	21A_d1B	0.001	-	33	High
Clay	A	21	Arabidopsis	21A_d2A	0.037	-	44	High
Clay	A	21	Arabidopsis	21A_d2B	0.095	4.1	44	High
Clay	B	24	Arabidopsis	24A_d1A	0.019	-	33	High
Clay	B	24	Arabidopsis	24A_d1B	0.003	-	33	High
Clay	B	24	Arabidopsis	24A_d2A	0.01	-	44	High
Clay	B	24	Arabidopsis	24A_d2B	0.072	3.9	44	High
Clay	A	32	Arabidopsis	32A_d1A	0.0007	-	33	Low
Clay	A	32	Arabidopsis	32A_d1B	0.0008	-	33	Low
Clay	A	32	Arabidopsis	32A_d2A	0.011	-	44	Low
Clay	A	32	Arabidopsis	32A_d2B	0.024	-	44	Low
Clay	B	79	Arabidopsis	79A_d1A	0.008	-	33	Low
Clay	B	79	Arabidopsis	79A_d1B	0.0008	-	33	Low
Clay	B	79	Arabidopsis	79A_d2A	0.085	-	44	Low
Clay	B	79	Arabidopsis	79A_d2B	0.0007	2	44	Low
Clay	A	4	Festuca	4F_d1A	0.035	18	47	Control
Clay	A	4	Festuca	4F_d1B	0.057	22.2	47	Control
Clay	A	4	Festuca	4F_d2A	0.097	21.6	63	Control
Clay	A	4	Festuca	4F_d2B	0.029	17.2	63	Control
Clay	B	71	Festuca	71F_d1A	0.034	23.2	47	Controle
Clay	B	71	Festuca	71F_d1B	0.068	17.9	47	Controle
Clay	B	71	Festuca	71F_d2A	0.056	18.3	63	Controle
Clay	B	71	Festuca	71F_d2B	0.027	12.1	63	Controle
Clay	A	18	Festuca	18F_d1A	0.024	18.8	47	High
Clay	A	18	Festuca	18F_d1B	0.056	21.2	47	High
Clay	A	18	Festuca	18F_d2A	0.033	17.4	63	High
Clay	A	18	Festuca	18F_d2B	0.058	17.7	63	High
Clay	B	49	Festuca	49F_d1A	0.069	21.5	47	High
Clay	B	49	Festuca	49F_d1B	0.059	22.1	47	High
Clay	B	49	Festuca	49F_d2A	0.07	16.3	63	High
Clay	B	49	Festuca	49F_d2B	0.143	23.1	63	High
Clay	A	25	Festuca	25F_d1A	-	-	47	Low
Clay	A	25	Festuca	25F_d1B	-	-	47	Low
Clay	A	25	Festuca	25F_d2A	0.001	6.1	63	Low
Clay	A	25	Festuca	25F_d2B	-	-	63	Low
Clay	B	58	Festuca	58F_d1A	0.001	4	47	Low
Clay	B	58	Festuca	58F_d1B	0.02	14.6	47	Low
Clay	B	58	Festuca	58F_d2A	0.06	21.5	63	Low
Clay	B	58	Festuca	58F_d2B	0.112	25.2	63	Low
Clay	A	12	Trifolium	12T_d1A	0.017	6	28	Control
Clay	A	12	Trifolium	12T_d1B	0.012	5.5	28	Control
Clay	A	12	Trifolium	12T_d2A	0.085	13.2	44	Control
Clay	A	12	Trifolium	12T_d2B	0.061	11.6	44	Control
Clay	B	61	Trifolium	61T_d1A	0.016	6.3	28	Controle
Clay	B	61	Trifolium	61T_d1B	0.016	4.5	28	Controle
Clay	B	61	Trifolium	61T_d2A	0.117	12.9	44	Controle
Clay	B	61	Trifolium	61T_d2B	0.049	10.2	44	Controle
Clay	A	56	Trifolium	56T_d1A	0.015	7.5	28	High
Clay	A	56	Trifolium	56T_d1B	0.027	8.4	28	High
Clay	A	56	Trifolium	56T_d2A	0.103	13.5	44	High
Clay	A	56	Trifolium	56T_d2B	0.104	13.6	44	High
Clay	B	70	Trifolium	70T_d1A	0.02	7.4	28	High
Clay	B	70	Trifolium	70T_d1B	0.019	7.1	28	High
Clay	B	70	Trifolium	70T_d2A	0.149	18.3	44	High
Clay	B	70	Trifolium	70T_d2B	0.079	11.2	44	High
Clay	A	30	Trifolium	30T_d1A	0.009	4.5	28	Low
Clay	A	30	Trifolium	30T_d1B	0.006	4.1	28	Low
Clay	A	30	Trifolium	30T_d2A	0.114	14.3	44	Low
Clay	A	30	Trifolium	30T_d2B	0.022	3.4	44	Low
Clay	B	67	Trifolium*	67T_d1A	0.018	6.6	28	Low
Clay	B	67	Trifolium*	67T_d1B	0.047	9.3	28	Low
Clay	B	67	Trifolium*	67T_d2A	0.111	13.1	44	Low
Clay	B	67	Trifolium*	67T_d2B	0.109	9.6	44	Low
Clay	A	42	Wheat	42W_d1A	0.014	13.2	20	Controle
Clay	A	42	Wheat	42W_d1B	0.029	15.1	20	Controle
Clay	A	42	Wheat	42W_d2A	0.059	24	34	Controle
Clay	A	42	Wheat	42W_d2B	0.06	22.6	34	Controle
Clay	B	63	Wheat	63W_d1A	0.04	22.5	20	Controle
Clay	B	63	Wheat	63W_d1B	0.028	17.5	20	Controle
Clay	B	63	Wheat	63W_d2A	0.045	25.1	34	Controle
Clay	B	63	Wheat	63W_d2B	0.04	22.1	34	Controle
Clay	A	65	Wheat	65W_d1A	0.06	23.3	20	High
Clay	A	65	Wheat	65W_d1B	0.027	24.6	20	High
Clay	A	65	Wheat	65W_d2A	0.143	32.6	34	High
Clay	A	65	Wheat	65W_d2B	0.102	27.6	34	High
Clay	B	77	Wheat	77W_d1A	0.02	15.7	20	High
Clay	B	77	Wheat	77W_d1B	0.04	22.7	20	High
Clay	B	77	Wheat	77W_d2A	0.077	27.8	34	High
Clay	B	77	Wheat	77W_d2B	0.12	30	34	High
Clay	A	45	Wheat	45W_d1A	0.06	23.9	20	Low
Clay	A	45	Wheat	45W_d1B	0.061	24.5	20	Low
Clay	A	45	Wheat	45W_d2A	0.134	32.5	34	Low
Clay	A	45	Wheat	45W_d2B	0.04	20.3	34	Low
Clay	B	60	Wheat	60W_d1A	0.025	17.5	20	Low
Clay	B	60	Wheat	60W_d1B	0.044	23	20	Low
Clay	B	60	Wheat	60W_d2A	0.083	25.2	34	Low
Clay	B	60	Wheat	60W_d2B	0.152	31.2	34	Low
Mix	A	57	Arabidopsis	57A_d1A	0.0002	-	33	Controle
Mix	A	57	Arabidopsis	57A_d1B	0.0008	-	33	Controle
Mix	A	57	Arabidopsis	57A_d2A	0.03	-	44	Controle
Mix	A	57	Arabidopsis	57A_d2B	0.0004	-	44	Controle
Mix	B	64	Arabidopsis	64A_d1A	0.0005	-	33	Controle
Mix	B	64	Arabidopsis	64A_d1B	0.006	-	33	Controle
Mix	B	64	Arabidopsis	64A_d2A	0.01	-	44	Controle
Mix	B	64	Arabidopsis	64A_d2B	0.015	-	44	Controle
Mix	A	10	Arabidopsis	10A_d1A	0.0007	-	33	High
Mix	A	10	Arabidopsis	10A_d1B	0.0008	-	33	High
Mix	A	10	Arabidopsis	10A_d2A	0.0007	-	44	High
Mix	A	10	Arabidopsis	10A_d2B	0.0009	-	44	High
Mix	B	40	Arabidopsis	40A_d1A	0.003	-	33	High
Mix	B	40	Arabidopsis	40A_d1B	0.0002	-	33	High
Mix	B	40	Arabidopsis	40A_d2A	0.025	-	44	High
Mix	B	40	Arabidopsis	40A_d2B	0.022	-	44	High
Mix	A	39	Arabidopsis	39A_d1A	0.0003	-	33	Low
Mix	A	39	Arabidopsis	39A_d1B	0.0005	-	33	Low
Mix	A	39	Arabidopsis	39A_d2A	0.025	-	44	Low
Mix	A	39	Arabidopsis	39A_d2B	0.04	9.4	44	Low
Mix	B	76	Arabidopsis	76A_d1A	0.001	-	33	Low
Mix	B	76	Arabidopsis	76A_d1B	0.0033	-	33	Low
Mix	B	76	Arabidopsis	76A_d2A	0.0008	-	44	Low
Mix	B	76	Arabidopsis	76A_d2B	0.075	-	44	Low
Mix	A	9	Festuca	9F_d1A	0.032	19.6	47	Control
Mix	A	9	Festuca	9F_d1B	0.008	10.1	47	Control
Mix	A	9	Festuca	9F_d2A	0.028	16.6	63	Control
Mix	A	9	Festuca	9F_d2B	0.069	21.4	63	Control
Mix	B	66	Festuca	66F_d1A	0.027	13.9	47	Controle
Mix	B	66	Festuca	66F_d1B	0.033	19.7	47	Controle
Mix	B	66	Festuca	66F_d2A	0.035	20.3	63	Controle
Mix	B	66	Festuca	66F_d2B	0.083	17.8	63	Controle
Mix	A	2	Festuca	2F_d1A	0.032	20.6	47	High
Mix	A	2	Festuca	2F_d1B	0.03	16.5	47	High
Mix	A	2	Festuca	2F_d2A	0.091	21.7	63	High
Mix	A	2	Festuca	2F_d2A	0.078	24.5	63	High
Mix	B	54	Festuca	54F_d1A	0.031	15.3	47	High
Mix	B	54	Festuca	54F_d1B	0.019	20.4	47	High
Mix	B	54	Festuca	54F_d2A	0.055	20.3	63	High
Mix	B	54	Festuca	54F_d2B	0.065	19.2	63	High
Mix	A	52	Festuca	52F_d1A	0.051	22.2	47	Low
Mix	A	52	Festuca	52F_d1B	0.029	13.7	47	Low
Mix	A	52	Festuca	52F_d2A	0.073	21.7	63	Low
Mix	A	52	Festuca	52F_d2B	0.063	13.5	63	Low
Mix	B	6	Festuca	6F_d1A	0.033	15	47	Low
Mix	B	6	Festuca	6F_d1B	0.025	18	47	Low
Mix	B	6	Festuca	6F_d2A	0.075	17.6	63	Low
Mix	B	6	Festuca	6F_d2B	0.068	18.8	63	Low
Mix	A	53	Trifolium	53T_d1A	0.019	8	28	Controle
Mix	A	53	Trifolium	53T_d1B	0.012	5	28	Controle
Mix	A	53	Trifolium	53T_d2A	0.08	11.9	44	Controle
Mix	A	53	Trifolium	53T_d2B	0.137	14.6	44	Controle
Mix	A	26	Trifolium	26T_d1A	0.024	8.2	28	High
Mix	A	26	Trifolium	26T_d1B	0.012	4.9	28	High
Mix	A	26	Trifolium	26T_d2A	0.074	11.3	44	High
Mix	A	26	Trifolium	26T_d2B	0.089	12.4	44	High
Mix	A	28	Trifolium	28T_d1A	0.019	8.7	28	Low
Mix	A	28	Trifolium	28T_d1B	0.028	10	28	Low
Mix	A	28	Trifolium	28T_d2A	0.059	9	44	Low
Mix	A	28	Trifolium	28T_d2B	0.076	12.1	44	Low
Mix	B	7	Trifolium	7T_d1A	0.025	7.2	28	Low
Mix	B	7	Trifolium	7T_d1B	0.016	8.1	28	Low
Mix	B	7	Trifolium	7T_d2A	0.08	13.9	44	Low
Mix	B	7	Trifolium	7T_d2B	0.11	13.4	44	Low
Mix	B	43	Trifolium*	43T_d1A	0.015	6.5	28	Controle
Mix	B	43	Trifolium*	43T_d1B	0.025	8.4	28	Controle
Mix	B	43	Trifolium*	43T_d2A	0.103	12	44	Controle
Mix	B	43	Trifolium*	43T_d2B	0.117	14.1	44	Controle
Mix	B	73	Trifolium*	73T_d1A	0.027	9.9	28	High
Mix	B	73	Trifolium*	73T_d1B	0.015	5.2	28	High
Mix	B	73	Trifolium*	73T_d2A	0.033	8.2	44	High
Mix	B	73	Trifolium*	73T_d2B	0.164	14.1	44	High
Mix	A	22	Wheat	22W_d1A	0.043	19.3	20	Control
Mix	A	22	Wheat	22W_d1B	0.056	22.3	20	Control
Mix	A	22	Wheat	22W_d2A	0.059	21.3	34	Control
Mix	A	22	Wheat	22W_d2B	0.053	20.7	34	Control
Mix	B	48	Wheat	48W_d1A	0.022	15.9	20	Controle
Mix	B	48	Wheat	48W_d1B	0.057	24	20	Controle
Mix	B	48	Wheat	48W_d2A	0.042	16.7	34	Controle
Mix	B	48	Wheat	48W_d2B	0.053	24.7	34	Controle
Mix	A	13	Wheat	13W_d1A	0.041	17.8	20	High
Mix	A	13	Wheat	13W_d1B	0.033	16	20	High
Mix	A	13	Wheat	13W_d2A	0.117	28.5	34	High
Mix	A	13	Wheat	13W_d2B	0.064	18.6	34	High
Mix	B	23	Wheat	23W_d1A	0.063	22.8	20	High
Mix	B	23	Wheat	23W_d1B	0.038	21.3	20	High
Mix	B	23	Wheat	23W_d2A	0.117	26.7	34	High
Mix	B	23	Wheat	23W_d2B	0.05	22.3	34	High
Mix	A	37	Wheat	37W_d1A	0.051	21.5	20	Low
Mix	A	37	Wheat	37W_d1B	0.036	18.7	20	Low
Mix	A	37	Wheat	37W_d2A	0.067	23.3	34	Low
Mix	A	37	Wheat	37W_d2B	0.072	24.2	34	Low
Mix	B	55	Wheat	55W_d1A	0.022	17.5	20	Low
Mix	B	55	Wheat	55W_d1B	0.054	24.4	20	Low
Mix	B	55	Wheat	55W_d2A	0.068	24	34	Low
Mix	B	55	Wheat	55W_d2B	0.094	25.8	34	Low
Potting soil	A	1	Arabidopsis	1A_d1A	0.177	-	33	Control
Potting soil	A	1	Arabidopsis	1A_d1B	0.017	-	33	Control
Potting soil	A	1	Arabidopsis	1A_d2A	0.064	20.4	44	Control
Potting soil	A	1	Arabidopsis	1A_d2B	0.082	29.5	44	Control
Potting soil	B	34	Arabidopsis	34A_d1A	0.169	-	33	Controle
Potting soil	B	34	Arabidopsis	34A_d1B	0.031	-	33	Controle
Potting soil	B	34	Arabidopsis	34A_d2A	0.147	37.6	44	Controle
Potting soil	B	34	Arabidopsis	34A_d2B	0.112	37.2	44	Controle
Potting soil	A	44	Festuca	44F_d1A	0.234	23	47	Controle
Potting soil	A	44	Festuca	44F_d1B	0.141	21.7	47	Controle
Potting soil	A	44	Festuca	44F_d2A	0.126	19.5	63	Controle
Potting soil	A	44	Festuca	44F_d2B	0.128	20.3	63	Controle
Potting soil	B	62	Festuca	62F_d1A	0.166	24.3	47	Controle
Potting soil	B	62	Festuca	62F_d1B	0.177	22.9	47	Controle
Potting soil	B	62	Festuca	62F_d2A	0.12	23.7	63	Controle
Potting soil	B	62	Festuca	62F_d2B	0.419	32.2	63	Controle
Potting soil	A	78	Trifolium	78T_d1A	0.11	12.6	28	Controle
Potting soil	A	78	Trifolium	78T_d1B	0.064	10.5	28	Controle
Potting soil	A	78	Trifolium	78T_d2A	0.387	15.6	44	Controle
Potting soil	A	78	Trifolium	78T_d2B	0.248	16.5	44	Controle
Potting soil	B	80	Trifolium	80T_d1A	0.096	11.3	28	Controle
Potting soil	B	80	Trifolium	80T_d1B	0.131	16.2	28	Controle
Potting soil	B	80	Trifolium	80T_d2A	0.298	12.6	44	Controle
Potting soil	B	80	Trifolium	80T_d2B	0.429	15.6	44	Controle
Potting soil	A	5	Wheat	5W_d1A	0.218	35.5	20	Control
Potting soil	A	5	Wheat	5W_d1B	0.155	30.6	20	Control
Potting soil	A	5	Wheat	5W_d2A	0.23	29.6	34	Control
Potting soil	A	5	Wheat	5W_d2B	0.24	31.3	34	Control
Potting soil	B	38	Wheat	38W_d1A	0.1	30.6	20	Controle
Potting soil	B	38	Wheat	38W_d1B	0.177	37.1	20	Controle
Potting soil	B	38	Wheat	38W_d2A	0.224	29.6	34	Controle
Potting soil	B	38	Wheat	38W_d2B	0.315	35.7	34	Controle
Sand	A	41	Arabidopsis	41A_d1A	0.0019	-	33	Controle
Sand	A	41	Arabidopsis	41A_d1B	-	-	33	Controle
Sand	A	41	Arabidopsis	41A_d2A	0.01	-	44	Controle
Sand	A	41	Arabidopsis	41A_d2B	0.009	-	44	Controle
Sand	B	47	Arabidopsis	47A_d1A	0.0011	-	33	Controle
Sand	B	47	Arabidopsis	47A_d1B	0.001	-	33	Controle
Sand	B	47	Arabidopsis	47A_d2A	0.01	-	44	Controle
Sand	B	47	Arabidopsis	47A_d2B	0.008	-	44	Controle
Sand	A	72	Arabidopsis	72A_d1A	0.014	-	33	High
Sand	A	72	Arabidopsis	72A_d1B	0.017	-	33	High
Sand	A	72	Arabidopsis	72A_d2A	0.039	21.6	44	High
Sand	A	72	Arabidopsis	72A_d2B	0.055	-	44	High
Sand	B	74	Arabidopsis	74A_d1A	0.011	-	33	High
Sand	B	74	Arabidopsis	74A_d1B	0.015	-	33	High
Sand	B	74	Arabidopsis	74A_d2A	0.033	10.7	44	High
Sand	B	74	Arabidopsis	74A_d2B	0.032	5.1	44	High
Sand	A	59	Arabidopsis	59A_d1A	0.001	-	33	Low
Sand	A	59	Arabidopsis	59A_d1B	0.007	-	33	Low
Sand	A	59	Arabidopsis	59A_d2A	0.023	0.9	44	Low
Sand	A	59	Arabidopsis	59A_d2B	0.013	9.2	44	Low
Sand	B	20	Arabidopsis	20A_d1A	0.005	-	33	Low
Sand	B	20	Arabidopsis	20A_d1B	0.009	-	33	Low
Sand	B	20	Arabidopsis	20A_d2A	0.014	-	44	Low
Sand	B	20	Arabidopsis	20A_d2B	0.028	1.2	44	Low
Sand	A	11	Festuca	11F_d1A	0.023	13.5	47	Control
Sand	A	11	Festuca	11F_d1B	0.007	8.7	47	Control
Sand	A	11	Festuca	11F_d2A	0.027	14.7	63	Control
Sand	A	11	Festuca	11F_d2B	0.033	12.1	63	Control
Sand	B	51	Festuca	51F_d1A	0.011	12	47	Controle
Sand	B	51	Festuca	51F_d1B	0.005	8.5	47	Controle
Sand	B	51	Festuca	51F_d2A	0.02	17.3	63	Controle
Sand	B	51	Festuca	51F_d2B	0.02	16.5	63	Controle
Sand	A	68	Festuca	68F_d1A	0.001	8.3	47	High
Sand	A	68	Festuca	68F_d1B	0.001	4.5	47	High
Sand	A	68	Festuca	68F_d2A	0.083	17.3	63	High
Sand	A	68	Festuca	68F_d2B	0.031	17.7	63	High
Sand	B	75	Festuca	75F_d1A	0.066	17.6	47	High
Sand	B	75	Festuca	75F_d1B	0.019	11.5	47	High
Sand	B	75	Festuca	75F_d2A	0.05	22.8	63	High
Sand	B	75	Festuca	75F_d2B	0.021	17.2	63	High
Sand	A	46	Festuca	46F_d1A	0.034	15.7	47	Low
Sand	A	46	Festuca	46F_d1B	0.03	12.1	47	Low
Sand	A	46	Festuca	46F_d2A	0.056	17.5	63	Low
Sand	A	46	Festuca	46F_d2B	0.013	8.8	63	Low
Sand	B	15	Festuca	15F_d1A	0.041	17.9	47	Low
Sand	B	15	Festuca	15F_d1B	0.037	15.8	47	Low
Sand	B	15	Festuca	15F_d2A	0.031	16.2	63	Low
Sand	B	15	Festuca	15F_d2B	0.018	10.7	63	Low
Sand	A	50	Trifolium	50T_d1A	0.008	4.7	28	Controle
Sand	A	50	Trifolium	50T_d1B	0.007	3.7	28	Controle
Sand	A	50	Trifolium	50T_d2A	0.01	5.8	44	Controle
Sand	A	50	Trifolium	50T_d2B	0.008	5.5	44	Controle
Sand	A	17	Trifolium	17T_d1A	0.014	5.4	28	High
Sand	A	17	Trifolium	17T_d1B	0.016	5.6	28	High
Sand	A	17	Trifolium	17T_d2A	0.033	8.1	44	High
Sand	A	17	Trifolium	17T_d2B	0.017	7.4	44	High
Sand	B	27	Trifolium	27T_d1A	0.01	4.1	28	High
Sand	B	27	Trifolium	27T_d1B	0.011	4.6	28	High
Sand	B	27	Trifolium	27T_d2A	0.037	8.2	44	High
Sand	B	27	Trifolium	27T_d2B	0.007	3.5	44	High
Sand	A	3	Trifolium	3T_d1A	0.014	7.2	28	Low
Sand	A	3	Trifolium	3T_d1B	0.013	4.2	28	Low
Sand	A	3	Trifolium	3T_d2A	0.017	6.7	44	Low
Sand	A	3	Trifolium	3T_d2B	0.021	6.2	44	Low
Sand	B	8	Trifolium*	8T_d1A	0.01	4.5	28	Control
Sand	B	8	Trifolium*	8T_d1B	0.01	5	28	Control
Sand	B	8	Trifolium*	8T_d2A	0.02	7.4	44	Control
Sand	B	8	Trifolium*	8T_d2B	0.013	5.8	44	Control
Sand	B	19	Trifolium*	19T_d1A	0.01	3.5	28	Low
Sand	B	19	Trifolium*	19T_d1B	0.011	4.6	28	Low
Sand	B	19	Trifolium*	19T_d2A	0.021	7.7	44	Low
Sand	B	19	Trifolium*	19T_d2B	0.015	5.9	44	Low
Sand	A	16	Wheat	16W_d1A	0.022	13.2	20	Control
Sand	A	16	Wheat	16W_d1B	0.016	9.7	20	Control
Sand	A	16	Wheat	16W_d2A	0.088	26.7	34	Control
Sand	A	16	Wheat	16W_d2B	0.066	23.3	34	Control
Sand	B	29	Wheat	29W_d1A	0.047	18.4	20	Controle
Sand	B	29	Wheat	29W_d1B	0.03	14.4	20	Controle
Sand	B	29	Wheat	29W_d2A	0.059	19.5	34	Controle
Sand	B	29	Wheat	29W_d2B	0.039	15.5	34	Controle
Sand	A	31	Wheat	31W_d1A	0.031	18.1	20	High
Sand	A	31	Wheat	31W_d1B	0.032	22.1	20	High
Sand	A	31	Wheat	31W_d2A	0.033	20.4	34	High
Sand	A	31	Wheat	31W_d2B	0.065	24.7	34	High
Sand	B	36	Wheat	36W_d1A	0.055	22.2	20	High
Sand	B	36	Wheat	36W_d1B	0.044	21.6	20	High
Sand	B	36	Wheat	36W_d2A	0.059	24.4	34	High
Sand	B	36	Wheat	36W_d2B	0.069	22.9	34	High
Sand	A	35	Wheat	35W_d1A	0.069	22.2	20	Low
Sand	A	35	Wheat	35W_d1B	0.044	19.4	20	Low
Sand	A	35	Wheat	35W_d2A	0.029	15	34	Low
Sand	A	35	Wheat	35W_d2B	0.08	26.8	34	Low
Sand	B	14	Wheat	14W_d1A	0.008	10	20	Low
Sand	B	14	Wheat	14W_d1B	0.016	11.8	20	Low
Sand	B	14	Wheat	14W_d2A	0.053	20.2	34	Low
Sand	B	14	Wheat	14W_d2B	0.056	19	34	Low
